1 **Arl15 upregulates the TGF $\beta$  family signaling by promoting the assembly of the Smad-complex**

2

3 Meng Shi<sup>1,2</sup>, Hieng Chiong Tie<sup>1</sup>, Divyanshu Mahajan<sup>1</sup>, Xiuping Sun<sup>1</sup>, Yan Zhou<sup>1</sup>, Boon Kim Boh<sup>1</sup>, Leah A.  
4 Vardy<sup>1,2</sup>, and Lei Lu<sup>1</sup>

5

6 <sup>1</sup>School of Biological Sciences, Nanyang Technological University, 60 Nanyang Drive, Singapore 637551.

7 <sup>2</sup>A\*STAR Skin Research Laboratory and Skin Research Institute of Singapore, Biomedical Grove,  
8 Immunos, Singapore

9

10 Key words: Arf-like 15, TGF $\beta$  signaling, Smad4, GAP

11

12 Correspondence should be addressed to:

13 Lei Lu (PhD)

14 School of Biological Sciences

15 Nanyang Technological University

16 60 Nanyang Drive

17 Singapore 637551

18 Tel: 65-65922591

19 Fax: 65-67913856

20 Email: [lulei@ntu.edu.sg](mailto:lulei@ntu.edu.sg)

## 21 **Summary**

22 The hallmark event of the canonical transforming growth factor  $\beta$  (TGF $\beta$ ) family signaling is the assembly  
23 of the Smad-complex, consisting of the common Smad, Smad4, and phosphorylated receptor-regulated  
24 Smads. How the Smad-complex is assembled and regulated is still unclear. Here, we report that active  
25 Arl15, an Arf-like small G protein, specifically binds to the MH2 domain of Smad4 and colocalizes with  
26 Smad4 at the endolysosome. The binding relieves the autoinhibition of Smad4, which is imposed by the  
27 intramolecular interaction between its MH1 and MH2 domains. Activated Smad4 subsequently interacts  
28 with phosphorylated receptor-regulated Smads, forming the Smad-complex. Our observations suggest that  
29 Smad4 functions as an effector and a GTPase activating protein (GAP) of Arl15. Assembly of the Smad-  
30 complex enhances the GAP activity of Smad4 toward Arl15, therefore dissociating Arl15 before the nuclear  
31 translocation of the Smad-complex. Our data further demonstrate that Arl15 positively regulates the TGF $\beta$   
32 family signaling.

### 33 **Introduction**

34 The transforming growth factor  $\beta$  (TGF $\beta$ ) family signaling pathway is initiated by the TGF $\beta$  family cytokines,  
35 consisting of TGF $\beta$ s, nodals, activins, growth and differentiation factors, and bone morphogenetic proteins  
36 (BMPs)(Derynck and Budi, 2019; Massague, 2012; Schmierer and Hill, 2007; Wrana, 2013). The pathway  
37 can profoundly affect the development and homeostasis of animal tissue and has long been recognized as  
38 one of the most critical contributors to multiple human diseases such as cancers, fibrotic disorders, and  
39 cardiovascular diseases(Goumans and Ten Dijke, 2018; Kim et al., 2018; Seoane and Gomis, 2017). The  
40 core molecular framework of this pathway was outlined more than a decade ago(Massague, 2012;  
41 Schmierer and Hill, 2007). In the canonical TGF $\beta$  and BMP signaling pathways (hereafter referred to as the  
42 TGF $\beta$  and BMP signaling pathways), the TGF $\beta$  family cytokines first bind to and activate the type II and I  
43 receptor kinases, which phosphorylate receptor-regulated Smads (R-Smads), including TGF $\beta$ -specific  
44 Smad2 and 3 (hereafter referred to as TGF $\beta$  R-Smads) and BMP-specific Smad1, 5 and 8 (hereafter  
45 referred to as BMP R-Smads). Smads share a three-domain organization comprising N-terminal MH1 and  
46 C-terminal MH2 domain connected by a linker region. The type I receptor kinase phosphorylates the MH2  
47 domain of an R-Smad. After phosphorylation, phospho-R-Smads and Smad4 assemble a complex, usually  
48 a heterotrimer with two phospho-R-Smads and one Smad4, via the association of their MH2  
49 domains(Chacko et al., 2001; Chacko et al., 2004). Eventually, the Smad-complex translocates to the  
50 nucleus and executes genomic actions by chromatin remodeling, transcriptional activation, or repression of  
51 responsive genes. The formation of phospho-R-Smad and Smad4 complex is a central event in the TGF $\beta$   
52 family signaling pathway. However, we still do not entirely understand this event at the molecular and  
53 cellular level. A fundamental question is how the assembly of the Smad-complex is initiated and regulated.  
54 Hata *et al.* previously reported that the self-autoinhibition of Smads regulates the assembly(Hata et al.,  
55 1997). They found that, in Smad4, the MH1 domain intramolecularly interacts with the MH2 domain,  
56 therefore preventing full-length Smad4 from interacting with R-Smads. What relieves the autoinhibition of  
57 Smad4 and how the resulting active Smad4 subsequently complexes with R-Smads are currently unknown.  
58  
59 Small G proteins are molecular switches that regulate diverse cellular processes. In the G protein  
60 cycle(Cherfils and Zeghouf, 2013), the guanine nucleotide exchange factor (GEF) activates an inactive or

61 GDP-bound G protein to become the GTP-loaded or active form, which binds to its effectors and triggers  
62 cellular effects. The active G protein requires the GTPase activating protein (GAP) to hydrolyze the bound  
63 GTP and terminate its active state, completing the G protein cycle by returning it to its initial GDP-bound or  
64 inactive form. Arf-family G proteins are divided into Arf, Sar, and Arf-like (Arl) groups(Donaldson and  
65 Jackson, 2011; Sztul et al., 2019). Arf and Sar group members have well-documented cellular roles in  
66 recruiting vesicular coats and regulating lipid production. Arl group has the most members (>20), but most  
67 of them are poorly studied. They have diverse cellular functions, such as membrane trafficking, organelle  
68 positioning, microtubule dynamics, and ciliogenesis(Donaldson and Jackson, 2011; Sztul et al., 2019).

69 Arl15 is an uncharacterized Arl group member. It becomes interesting after a series of genome-wide  
70 association studies linked its gene locus to rheumatoid arthritis, multiple metabolic traits, such as body  
71 shape, blood lipid level, and magnesium homeostasis, and metabolic diseases, such as type 2 diabetes  
72 mellitus, coronary heart disease, and childhood obesity(Corre et al., 2018; Danila et al., 2013; Glessner et  
73 al., 2010; Li et al., 2014; Negi et al., 2013; Replication et al., 2014; Richards et al., 2009; Ried et al., 2016;  
74 Sun et al., 2015; Willer et al., 2013). It is unclear whether *ARL15* is the causative gene and how its genetic  
75 changes can lead to the aforementioned diseases since its molecular and cellular functions are largely  
76 unknown. Recent studies suggested that Arl15 might play a role in insulin signaling, adiponectin secretion,  
77 and adipogenesis(Rocha et al., 2017; Zhao et al., 2017). Here, we identified Arl15 as a novel regulator of  
78 the TGF $\beta$  family signaling. We found that it can directly bind to and activate autoinhibited Smad4 to promote  
79 the assembly of the Smad-complex. At the same time, the Smad4-containing complex negatively feedbacks  
80 to Arl15 by accelerating the GTP hydrolysis of Arl15. Therefore, our data demonstrate that Smad4 acts as  
81 an effector and GAP for small G protein Arl15.

## 82 **Results**

### 83 **Arl15-GTP can directly interact with Smad4**

84 During our systematic study of Arl group small G proteins, we focused on Arl15 due to its genetic implication  
85 in human diseases(Corre et al., 2018; Danila et al., 2013; Glessner et al., 2010; Li et al., 2014; Negi et al.,  
86 2013; Replication et al., 2014; Richards et al., 2009; Ried et al., 2016; Sun et al., 2015; Willer et al., 2013).  
87 Arl15 is ubiquitously expressed in human tissues, and its orthologs are present in most metazoans  
88 (Supplementary Fig. 1a). We found that exogenously expressed and endogenous Arl15 localized to the  
89 Golgi (Fig. 1a; Supplementary. Fig. 1b). Similar to other small G proteins(Feig, 1999; Sztul et al., 2019),  
90 GTP non-hydrolyzable mutation (GTP-bound or active form mutation), A86L (hereafter referred to as AL;  
91 see below for the experimental confirmation), and GDP-bound or inactive form mutation, T46N (hereafter  
92 referred to as TN), were introduced to Arl15. We found that both mutants localized to the Golgi similar to  
93 the wild type (WT) (Supplementary Fig. 1b). In addition to the Golgi, WT and AL-mutant Arl15-GFP were  
94 also detected at the plasma membrane (PM), early endosome (EE), late endosome (LE), and lysosome  
95 (Fig. 1b; Supplementary Fig. 1c).

96 Yeast two-hybrid screening was subsequently performed to identify potential interacting partners of Arl15.  
97 Using Arl15-AL as a bait, we uncovered Smad4 as the most robust hit. Their interaction was confirmed by  
98 immunoprecipitation (IP) assays. We found that exogenously expressed and C-terminally GFP-tagged  
99 Arl15-AL, but not Arl15-TN, pulled down endogenous Smad4 (Fig. 1c). In contrast, Arl5b, another member  
100 of Arl group, showed negative results in either GTP (Q70L) or GDP-mutant (T30N) form(Shi et al., 2018).  
101 In the reverse IP, endogenous Smad4 pulled down substantially more endogenous Arl15 in the presence  
102 of guanosine 5' -[ $\beta,\gamma$ -imido]triphosphate (GMPPNP), a non-hydrolyzable GTP analog, than GDP (Fig. 1d).  
103 In Figure 1d, the weak pull-down band in the GDP panel is likely due to the cellular GTP. To explore which  
104 domain or region of Smad4 interacts with active Arl15, we prepared GST-fused Smad4 fragments  
105 (Supplementary Fig. 2a) and tested if they pull down Arl15-AL-GFP expressed in cell lysate (Fig. 1e;  
106 Supplementary. Fig. 2b). We found that the Smad4-MH2 domain, but not the MH1 domain or linker region,  
107 is sufficient to interact with Arl15-GTP. We noticed that the addition of the linker region significantly  
108 increased the pull-down of Arl15-GTP by the MH2 domain, as shown in pull-downs by GST-tagged Smad4-

109 linker-MH2 and full-length Smad4 (Fig. 1e,f), demonstrating that the linker region probably contributes to  
110 the interaction too.

111 Although all MH2 domains share a similarity in sequences and structures, using purified GST-fusion  
112 proteins, we found that, while none of these MH2 domains interacted with His-Arl15-TN (Fig. 1g), only the  
113 MH2 domain of Smad4, but not that of Smad1, 2, and 3, directly bound to purified His-Arl15-AL (Fig. 1g,h).  
114 Extending the MH2 domain of Smad3 to include its linker region did not make the resulting chimera, GST-  
115 Smad3-linker-MH2, interact with Arl15-AL either (Fig. 1h). Since MH2 domains of BMP R-Smads, including  
116 Smad1, 5, and 8, share almost identical sequences with > 90% identity, our findings indicate that Arl15-  
117 GTP directly interacts with Smad4, but not TGF $\beta$  and BMP R-Smads.

118 Many interactions between a small G protein and its effectors involve the switch-II region of the small G  
119 protein, which undergoes disorder-to-order transition upon GTP-binding (Cherfils and Zeghouf, 2013; Vetter  
120 and Wittinghofer, 2001). To investigate the role of the switch-II region, we further mutated Arl15-AL by  
121 swapping its switch-II region with that of Arl5b, another Arl group small G protein that localizes to the  
122 Golgi (Shi et al., 2018) (Supplementary Fig. 1a). The resulting mutant, Arl15-AL-sw2, was able to bind to  
123 GTP as demonstrated by the GTP-agarose pull-down assay (Supplementary Fig. 2c), suggesting that the  
124 mutant might fold properly. In the subsequent Co-IP, we found that Arl15-AL-sw2-GFP failed to interact  
125 with co-expressed Myc-Smad4 (Fig. 1i), confirming the essential role of the switch-II in the interaction  
126 between Arl15 and Smad4. In summary, our data demonstrate that Arl15-GTP can directly and specifically  
127 interact with the MH2 domain of Smad4.

### 128 **Arl15-GTP colocalizes with Smad4 at the endolysosome**

129 Smads likely localize to the endosome since they interact with SARA and endofin, adaptor proteins that  
130 possess endosome-targeting FYVE domains (Chen et al., 2007; Gillooly et al., 2001; Seet and Hong, 2001;  
131 Shi et al., 2007; Tsukazaki et al., 1998). Although immunostaining did not reveal a clear membrane  
132 association of Smad4, our live-cell confocal imaging uncovered a limited colocalization between mCherry-  
133 Smad4 and Arl15-AL-GFP at punctate structures (Fig. 2a). The weak punctate appearance of mCherry-  
134 Smad4 is likely due to the masking effect of its high cytosolic concentration. Alternatively, it might be due

135 to the closed conformation of Smad4, which is formed by the intramolecular interaction between its MH1  
136 and MH2 domains (see below). Therefore, we tested the mCherry-tagged Smad4-MH2 domain, which does  
137 not possess the inhibitory MH1 domain (Supplementary Fig. 2a). We observed that it displayed a much  
138 more robust punctate pattern, which colocalized with Arl15-AL-GFP (Fig. 2b,c). Further study revealed that  
139 these Smad4-MH2 positive puncta are primarily the EE, LE, and lysosome but not the recycling endosome  
140 (RE) (Fig. 2c,d). Together with our study of Arl15 (Fig. 1b; Supplementary Fig. 1c), our imaging data suggest  
141 that Arl15-GTP might interact with Smad4 at the endolysosome. The absence of the Smad4-MH2 domain  
142 at the Golgi, where most Arl15-AL-GFP resides, suggests an unknown *in vivo* mechanism restricting their  
143 interaction to the endolysosomal membrane.

#### 144 **Arl15-GTP indirectly interacts with R-Smads via Smad4**

145 Although Arl15-GTP does not directly bind to R-Smads, we noticed that, in addition to Smad4, a significant  
146 amount of endogenous R-Smads, such as Smad2 and Smad1/5/8, was pulled down from cell lysates by  
147 GST-Arl15-AL, but not TN (Fig. 3a). The anti-Smad2/3 antibody used in Figure 3a should primarily detect  
148 endogenous Smad2 in our HEK293T cells since the band it detected was substantially reduced by the  
149 siRNA-mediated knockdown of Smad2, but not that of Smad3 (Supplementary Fig. 3a).

150 Under normal cell culture condition, TGF $\beta$ s in the serum(Danielpour et al., 1989) initiate a basal level of the  
151 TGF $\beta$  signaling to phosphorylate R-Smads. Since Smad4 can form a complex with phospho-R-Smads via  
152 their MH2 domains(Chacko et al., 2001; Chacko et al., 2004), our finding suggests that Smad4 probably  
153 bridges the indirect interaction between Arl15-GTP and phospho-R-Smads. The hypothesis was  
154 subsequently confirmed by the observation that bead-immobilized GST-Arl15-AL retained substantially  
155 more exogenously expressed R-Smads such as Smad1 and 2 (the BMP and TGF $\beta$  R-Smad respectively)  
156 in the presence than the absence of co-expressed Smad4 (Fig. 3b,c; Supplementary Fig. 3b). In GST-  
157 Arl15-AL pull-down without co-expressed Smad4, the residual amount of Smad1 and 2 (indicated by \*) was  
158 likely due to the indirect interaction mediated by endogenous Smad4.

159 To avoid endogenous Smad4, we tested similar pull-downs using purified components (Fig. 3d). To mimic  
160 phosphorylated Smad2, we prepared His-Smad2 with S465E/S467E mutations (hereafter referred to as

161 Smad2-SE)(Liu et al., 1997). We found that bead-immobilized GST-Arl15-AL pulled down Smad2-SE only  
162 in the presence of Smad4, therefore further supporting our hypothesis above. Likely, Arl15-GTP can  
163 indirectly interact with other R-Smads via Smad4 due to high identities shared among MH2 domains of  
164 TGF $\beta$  or BMP R-Smads. Hence, our data suggest that Arl15-GTP, R-Smad, and Smad4 might assemble  
165 as a complex.

#### 166 **Arl15-GTP activates Smad4**

167 Smads, including R-Smads and Smad4, adopt a closed conformation by an intramolecular association  
168 between MH1 and MH2 domains(Hata et al., 1997). Therefore, MH1 inhibits the corresponding MH2 domain  
169 and prevents the formation of the Smad-complex. We asked how Arl15-GTP affects the closed  
170 conformation of Smad4 by binding to its MH2 domain. Using truncated proteins comprising the MH1 or  
171 MH2 domain solely, we first confirmed that MH1 can interact with the corresponding MH2 domain in Smad4  
172 and Smad2 (Fig. 4a-d). Furthermore, we observed that co-expressed Arl15-AL, but not Arl15-TN,  
173 substantially reduced the interaction between MH1 and MH2 domains of Smad4 (Fig. 4a,b), demonstrating  
174 that Arl15-GTP probably displaces Smad4-MH1 domain by interacting with Smad4-MH2 domain. Our  
175 results hence suggest that active Arl15 might open the closed conformation of Smad4.

176 It has been documented that the Smad4-MH2 domain can interact with isolated MH2 domains of R-Smads  
177 in the absence of C-terminal phosphorylation(Hata et al., 1997; Wu et al., 2001). We found that the presence  
178 of the Smad4-MH2 domain did not substantially reduce the interaction between the MH1 and MH2 domains  
179 of Smad2 (Fig. 4c,d; compare lanes 1 and 4 of the first row of the gel blot). However, further addition of  
180 Arl15-AL (lane 2), but not Arl15-TN (lane 3), significantly weakened the interaction, suggesting that Arl15-  
181 GTP might promote the Smad4-MH2 domain to engage MH2 domains of R-Smads. Altogether, our  
182 biochemical data provide evidence that Arl15-GTP might activate Smad4 by relieving its MH2 domain from  
183 the intramolecular inhibition imposed by its MH1 domain.

#### 184 **Arl15-GTP promotes the assembly of the Smad-complex**

185 We next investigated the effect of Arl15-GTP on the assembly of the Smad-complex in the context of full-  
186 length Smads. In contrast to isolated MH2 domains, full-length R-Smads interact with Smad4 and assemble



187 into a complex only after their C-termini are phosphorylated(Hata et al., 1997; Kretzschmar et al., 1997).  
188 Our data confirmed these reports and further revealed a molecular role of Arl15 in the assembly of the  
189 Smad-complex. First, bead-immobilized GST-Smad4 pulled down a substantial amount of Smad2-SE, but  
190 not WT and the non-phosphorylatable mutant, Smad2-S465A/S467A (hereafter referred to as Smad2-SA)  
191 (Fig. 4e); consistently, GFP-tagged Smad2-SE, but not WT or Smad2-SA, was found to interact with Myc-  
192 Smad4 in the co-IP assay (Fig. 4f). Second, only Smad2-SE, but not Smad2-SA, was pulled down by bead-  
193 immobilized Arl15-AL in a Smad4-dependent manner (Fig. 4g). Third and most importantly, we observed  
194 that the interaction between Smad2-SE and Smad4, that is, the formation of the Smad-complex, was  
195 substantially enhanced in the presence of Arl15-AL (Fig. 4e,f). A similar promoting effect of Arl15-AL on the  
196 interaction between Smad1, a BMP R-Smad, and Smad4 was also observed (Supplementary Fig. 4).  
197 Collectively, our results showed that Arl15-GTP might promote the assembly of the Smad-complex by  
198 binding to and activating the Smad4-MH2 domain.

#### 199 **The Smad-complex functions as a GAP to inactivate Arl15-GTP**

200 Once assembled in the TGF $\beta$  family signaling pathway, the Smad-complex enters the nucleus to initiate  
201 genomic actions(Derynck and Budi, 2019; Massague, 2012; Schmierer and Hill, 2007; Wrana, 2013). We  
202 then asked if Arl15-GTP co-translocates to the nucleus together with the Smad-complex. Our fluorescence  
203 imaging and nuclear fractionation did not detect Arl15 in the nucleus under TGF $\beta$ 1 (Fig. 5a-c) or BMP2  
204 treatment (Supplementary Fig. 5a). In contrast, phospho-Smad2/3 (Fig. 5a,b), phospho-Smad1/5/8  
205 (Supplementary Fig. 5a), and Smad4 (Fig. 5b; Supplementary Fig. 5a) had increased presence in the  
206 nucleus under the same treatment, consistent with our current knowledge of the TGF $\beta$  family signaling  
207 pathway(Derynck and Budi, 2019; Massague, 2012; Schmierer and Hill, 2007; Wrana, 2013). Therefore,  
208 we reasoned that Arl15 might dissociate from the Smad-complex before the nuclear translocation of the  
209 latter. Our reasoning prompted us to test the hypothesis that the Smad-complex might act as a GAP to  
210 inactivate and consequently dissociate Arl15.

211 To that end, we first purified recombinant His-tagged Smad2-SE, Smad4, and Arl15 (WT or AL)  
212 (Supplementary Fig. 5b). Next, His-Arl15 (WT or AL) was first loaded with GTP and subsequently incubated  
213 with or without different combinations of His-Smad2-SE and His-Smad4. The inorganic phosphate released

214 during the GTP hydrolysis was enzymatically converted and continuously monitored by spectrophotometry  
215 (see Materials and Methods). We found that Arl15-WT alone displayed a weak GTP-hydrolysis activity and  
216 that the GTP hydrolysis rate of Arl15 was substantially accelerated by the presence of Smad4 but not  
217 Smad2-SE, demonstrating Smad4 as a potential GAP for Arl15 (Fig. 5d). Interestingly, the addition of  
218 Smad2-SE greatly enhanced the GAP activity of Smad4 toward Arl15. As expected for a small G protein,  
219 we observed that AL mutation abolished the GTP hydrolysis activity of Arl15 in all cases — either alone or  
220 with the addition of Smad4 or Smad2-SE, retrospectively confirming AL as the GTPase-defective mutation.  
221 Using purified domains of Smad4 (Supplementary Fig. 5b), we mapped the GAP activity to the MH2 domain  
222 of Smad4 (Fig. 5e). The extension of the MH2 domain to include the linker region further increased the  
223 GAP activity (Fig. 5e). The positive effect of the linker region on the GAP activity of the MH2 domain is  
224 probably due to the enhanced interaction between the Smad4-MH2 domain and Arl15-GTP (Fig. 1e,f). In  
225 summary, our data suggest that, after the assembly of the Smad-complex, Smad4 might have an enhanced  
226 GAP activity and consequently inactivate Arl15 and dissociate the latter from the complex.

### 227 **Arl15-GTP is an essential and positive regulator of TGF $\beta$ and BMP signaling pathways**

228 To understand the cellular significance of Arl15-Smad4 interaction, we investigated the effect of  
229 overexpression or depletion of Arl15 on TGF $\beta$ -induced transcriptions in HeLa cells. We first tested the  
230 transcription of Smad binding element $\times$ 4-luc (SBE $\times$ 4-luc), a luciferase reporter that comprises four tandem  
231 repeats of SBEs as its enhancer(Zawel et al., 1998). SBE $\times$ 4-luc is commonly used for assaying the TGF $\beta$   
232 R-Smad-dependent transcription or TGF $\beta$  signaling. We found that when HeLa cells were treated with a  
233 serum-free medium (serum-starvation or hereafter referred to as starvation), overexpression of Arl15-WT  
234 or AL, but not TN, was sufficient to stimulate the transcription of SBE $\times$ 4-luc to  $\geq$  2-fold that of the control  
235 (Fig. 6a). However, the stimulation was much weaker than that of TGF $\beta$ 1 treatment, which is  $\sim$  25-fold that  
236 of control (Fig. 6a). The stimulation was abolished by SB431542 (Supplementary Fig. 6a), a small molecule  
237 inhibitor of TGF $\beta$  type I receptor kinase activity(Laping et al., 2002). A possible explanation for these  
238 observations is that Arl15-AL might amplify the autocrine TGF $\beta$  signaling in HeLa cells(Qing et al., 2004)  
239 by promoting the formation of the Smad-complex. Similarly, we found that the overexpression of Arl15-WT  
240 or AL, but not TN, also stimulated the transcription of BRE-luc (Supplementary Fig. 6b), a luciferase reporter

241 for assaying the BMP R-Smad-dependent transcription or BMP signaling(Korchynskiy and ten Dijke, 2002).  
242 On the other hand, when endogenous Arl15 was depleted by RNAi (Supplementary Fig. 6c), TGF $\beta$ 1 or  
243 BMP2-induced reporter transcription was attenuated to less than half of the control, and the autocrine  
244 stimulated transcription also decreased under starvation (Fig. 6b; Supplementary Fig. 6d). Hence, our data  
245 imply that Arl15 is an essential and positive regulator of TGF $\beta$  and BMP signaling pathways.

246 Since some Arl group small G proteins can regulate intracellular trafficking(Donaldson and Jackson, 2011;  
247 Sztul et al., 2019), we wondered if Arl15 indirectly regulates TGF $\beta$  family signaling by its role in intracellular  
248 trafficking. Therefore, we first investigated if Arl15 is required for secretory trafficking. Using ManII (a Golgi  
249 transmembrane glycosidase) and TNF $\alpha$  (a PM-targeted transmembrane protein) RUSH  
250 reporters(Boncompain et al., 2012), we found that Arl15 knockdown did not substantially affect the ER-to-  
251 Golgi (Supplementary Fig. 6e,f) and the subsequent Golgi-to-PM trafficking (Supplementary Fig. 6g,h). Next,  
252 we observed that TGF $\beta$ 1-stimulated phosphorylation of Smad2/3 normally occurred upon knockdown of  
253 Arl15 (Supplementary Fig. 6i). Therefore, Arl15 is probably not required for steps leading to phosphorylation  
254 of Smad2/3, such as trafficking and maintenance of TGF $\beta$ 1 receptors and Smad2/3. In summary, our data  
255 argue against a hypothesis that Arl15 indirectly regulates the TGF $\beta$  family signaling by intracellular  
256 trafficking. Instead, they support a model in which Arl15 regulates the TGF $\beta$  family signaling by promoting  
257 the assembly of the Smad-complex.

### 258 **Arl15 is essential to stimulate the transcription of TGF $\beta$ target genes**

259 In addition to luciferase reporters, we also studied the effect of disrupting Arl15 on the cellular transcription  
260 profile of TGF $\beta$  target genes. To that end, we employed the MCF7 cell line, which represents early-stage  
261 or pre-malignant breast cancer cells(Comsa et al., 2015; Holliday and Speirs, 2011). In serum-starved  
262 MCF7 cells, overexpression of Arl15-AL, but not TN and empty vector control, was sufficient to upregulate  
263 the transcription of N-cadherin, ID1, Snail1, p27<sup>kip1</sup>, and p21<sup>cip1</sup>, and downregulate the transcription of E-  
264 cadherin and c-Myc (Fig. 6c). On the other hand, under the treatment of TGF $\beta$ 1, depletion of Arl15 in MCF7  
265 cells reversed the transcriptional trend of above genes compared to control knockdown, i.e., those that  
266 were upregulated by Arl15-AL overexpression became downregulated, and vice versa (Fig. 6d). A similar  
267 result was obtained when Arl15 was depleted in the MDA-MB-231 cell line, representing highly metastatic

268 breast cancer cells (Supplementary Fig. 6j,k). Therefore, our observation correlates the activity of Arl15  
269 with a gene transcription profile characteristic of the TGF $\beta$ -induced cytoostasis and EMT in cancer cells(Hao  
270 et al., 2019; Lamouille et al., 2014; Seoane and Gomis, 2017).

271 Since the AL mutation compromises the GTP hydrolysis activity of Arl15, Arl15-AL should sequester the  
272 Smad-complex and inhibit the downstream transcription event. Indeed, the overexpression of Arl15-AL  
273 reduced the transcription of SBE $\times$ 4-luc in HeLa cells under TGF $\beta$ 1 treatment (Supplementary Fig. 6l).  
274 However, our luciferase assays indicated that overexpression of Arl15-AL upregulates both TGF $\beta$  and BMP  
275 pathways under starvation, although to a limited extent (Fig. 6a; Supplementary Fig. 6b). Therefore, we  
276 hypothesize that Arl15-AL might have two opposing effects on the Smad-complex – promoting its assembly  
277 and inhibiting its nuclear translocation. Under starvation, the assembly of the Smad-complex might be the  
278 rate-limiting step when cellular phospho-Smad2/3 concentration is low under autocrine stimulation. Arl15-  
279 AL might spontaneously dissociate from the Smad-complex, freeing the Smad-complex for its subsequent  
280 nuclear translocation. Hence, the net effect is that Arl15-AL promotes transcription of SBE $\times$ 4-luc (Fig. 6a;  
281 Supplementary Fig. 6b). In contrast, under TGF $\beta$ 1 treatment, when the cellular phospho-Smad2/3  
282 concentration is high, the nuclear translocation of the Smad-complex becomes the rate-limiting step, and  
283 the net effect of Arl15-AL overexpression might be inhibitory.

#### 284 ***in vitro* migration and invasion of cancerous cells require Arl15**

285 The TGF $\beta$  signaling pathway is a well-known promoting factor for the metastasis of cancer cells(Hao et al.,  
286 2019; Lamouille et al., 2014; Seoane and Gomis, 2017). To explore the role of Arl15 in cancer metastasis,  
287 we assessed two key metastatic traits *in vitro*, cellular migration and invasion, using a highly metastatic  
288 breast cancer cell line – MDA-MB-231. By wound healing and collagen gel invasion assays, we observed  
289 that the migration and invasion of MDA-MB-231 cells were significantly reduced upon depletion of Arl15  
290 (Fig. 7a-d), therefore demonstrating the indispensable role of Arl15 in the migration and invasion of  
291 metastatic cancerous cells *in vitro*. Although the precise role of Arl15 in tumorigenesis requires further  
292 investigation, our current data are consistent with what has been documented about the TGF $\beta$  signaling  
293 pathway in the metastasis of cancers(Derynck and Budi, 2019; Hao et al., 2019; Lamouille et al., 2014;

294 Massague, 2012; Schmierer and Hill, 2007; Seoane and Gomis, 2017), thus further supporting Arl15 as an  
295 essential and positive regulator of this pathway.

### 296 **Some somatic mutations from cancer patients can compromise Arl15-Smad4 interaction**

297 Using cancer genomic databases, we explored mutations in cancer patients that can disrupt Arl15-Smad4  
298 interaction. We identified and tested somatic missense mutations at the G3-motif or switch-II region of Arl15:  
299 E82K, R90L, Y95C, and Y96F (Supplementary Fig. 1a) with two mutations at other locations, D58N and  
300 R150H. When each mutation was introduced in Arl15-AL, the resulting mutant protein displayed normal  
301 GTP-binding activity in the GTP-agarose pull-down assay (Supplementary Fig. 7), suggesting that these  
302 mutations might not disrupt the folding of Arl15. We found that the following single point mutations in the  
303 switch-II region specifically attenuated the Arl15-Smad4 interaction: R90L, Y95C, and Y96F, as  
304 demonstrated in our pull-down assays (Fig. 7e). These mutations also substantially reduced the stimulation  
305 of Arl15-AL in the transcription of SBE $\times$ 4-luc under starvation (Fig. 7f). Homodeletion, which is the major  
306 form of genetic alterations of *ARL15* gene, and several nonsense mutations found in the cancer genomic  
307 database should render *ARL15* null and reduce the normal TGF $\beta$  signaling activity, as shown by our Arl15  
308 knockdown experiment (Fig. 6b and Supplementary Fig. 6d). The TGF $\beta$  signaling pathway is tumor-  
309 suppressive for the proliferation of pre-malignant cancer cells (Hao et al., 2019; Lamouille et al., 2014;  
310 Massague, 2008; Seoane and Gomis, 2017). Therefore, our data demonstrate that cancer patients can  
311 have genetic mutations or alterations that compromise the Arl15-Smad4 interaction and suggest that such  
312 genetic changes might contribute to tumorigenesis by down-regulating the TGF $\beta$  signaling pathway.

## 313 Discussion

314 Our study uncovered Arl15 as a unique regulator of the TGF $\beta$  family signaling pathway. According to our  
315 knowledge, it is the first small G protein reported to interact with Smads. It positively regulates both TGF $\beta$   
316 and BMP pathways by directly interacting with the MH2 domain of common Smad, Smad4, and promoting  
317 the assembly of the Smad-complex. Interestingly, the Smad-complex serves as an effector and a GAP of  
318 Arl15 so that it dissociates Arl15 and subsequently enters the nucleus.

319 Our work provides a molecular mechanism on how closed or autoinhibited Smad4 becomes open or  
320 activated, an outstanding question in the field(Hata et al., 1997). We discovered that opening and, hence,  
321 activation of Smad4 is specifically aided by Arl15-GTP through direct binding to the MH2 domain of Smad4.  
322 A small G protein is regulated by its GEFs and GAPs, activities of which could be subject to further  
323 intracellular or extracellular stimuli. Hence, our study reveals Arl15 as a potential signaling integration node  
324 between a small G protein activation cascade and the TGF $\beta$  family signaling. The finding might provide us  
325 a new clue to understand the contextual and paradoxical nature of the TGF $\beta$  family signaling.

326 Based on our data, we propose a working model on the molecular role of Arl15 in the TGF $\beta$  family signaling  
327 (Fig. 7g). A currently unidentified GEF first activates Arl15-GDP to become GTP-loaded. Next, Smad4,  
328 mainly in a closed or inactive conformation, interacts with Arl15-GTP. Once bound to Arl15-GTP, Smad4-  
329 MH1 dissociates from its MH2 domain, rendering Smad4 in an open or active conformation. Though the  
330 Smad4-MH2 domain possesses a GAP activity toward Arl15, it might be too weak to inactivate Arl15-GTP  
331 *in vivo*. Therefore, a pool of Arl15-GTP-Smad4 complex might accumulate intracellularly. Upon stimulation  
332 by a TGF $\beta$  family cytokine, R-Smads (Smad2 as an example in Fig. 7g) are phosphorylated by TGF $\beta$  type  
333 I receptor kinase at their C-termini. With an activated MH2 domain, Arl15-bound Smad4 subsequently  
334 interacts with phospho-R-Smads. Since the R-Smad and Smad4 are known to assemble as a  
335 heterotrimer(Chacko et al., 2001; Chacko et al., 2004), it is tempting to speculate that one Arl15-GTP and  
336 one Smad-heterotrimer to form a heterotetramer. We further assume that associated Arl15 probably inhibits  
337 the nuclear translocation of the Smad-complex. By engaging R-Smads, the GAP activity of Smad4 is greatly  
338 enhanced and consequently triggers the GTP hydrolysis of Arl15. After the resulting Arl15-GDP dissociates  
339 from the Smad-complex, the latter translocates to the nucleus and executes eventual genomic actions.

340 Our model proposes that the Smad-complex is an effector and a terminator for active Arl15, which promotes  
341 the assembly of the Smad-complex in the first place. A similar case has been proposed for Sar1 and COPII  
342 coat complex(Antonny et al., 2001; Bi et al., 2002; Bi et al., 2007). Sar1 is an Arf-family small G protein that  
343 initiates the assembly of the COPII coat at the ER exit site. The COPII coat consists of repetitive units of  
344 two heterodimers, Sec23-Sec24, and Sec13-Sec31. In Sec23-Sec24 heterodimer, Sec23 functions as both  
345 an effector and a GAP for Sar1. The GAP activity of Sec23 is substantially boosted after Sec23-Sec24  
346 recruits Sec13-Sec31 to complete the budding of a COPII-coated vesicle. The hydrolysis of Sar1-bound  
347 GTP eventually uncoats COPII-coated vesicles, which prepares them for the subsequent transport and  
348 fusion. We note that Arl15 and Sar1 have Ala (at 86) and His (at 77) in their G3-motifs, respectively, in  
349 contrast to Gln of other Arf-family small G proteins. Conserved Gln in the G3-motif functions to facilitate the  
350 GTP hydrolysis by correctly positioning the water molecule. Therefore, termination of active Sar1 and Arl15  
351 *in vivo* probably requires their effector-cum-GAPs, which ensure the proper assembly of the COPII coat  
352 and the Smad-complex, respectively, before the complete dissociation of small G proteins. This property  
353 probably makes Sar1 and Arl15 a suitable initiator in promoting the assembly of large protein complexes.  
354 Confirmation of our speculation awaits future structural study of the Arl15-Smad-complex.

355 Our observation that Arl15 is essential for the invasion and migration of malignant cancer cells suggests  
356 that it might be a pro-metastatic factor. However, the finding of mutations compromising the Arl15-Smad4  
357 interaction in the cancer genomic database suggests that Arl15 might be a tumor suppressor. It is well known  
358 that the TGF $\beta$  signaling pathway possesses a context-dependent dual-role in cancer  
359 progression(Massague, 2008; Massague, 2012). In normal epithelia or pre-malignant cancers, the TGF $\beta$   
360 signaling pathway exerts a cytostatic or tumor-suppressive effect to inhibit the proliferation of cells. On the  
361 other hand, in malignant or metastatic cancers, TGF $\beta$  signaling exerts a pro-metastatic effect to promote  
362 growth and invasion of cells.

363 An example is the effector of Arl15, Smad4(Deckers et al., 2006). Consistent with the tumor-suppressive  
364 function of Smad4, depletion of Smad4 promotes the growth of NMuMG mammary gland epithelial cells; in  
365 contrast, the depletion of Smad4 inhibits the metastasis of MDA-MB-231 cells, in agreement with the pro-  
366 metastatic role of Smad4. Furthermore, inactivating mutations are commonly found in the *SMAD4* gene in

367 pre-malignant cancers such as pancreatic carcinoma, while *SMAD4* has been reported as an essential  
368 gene for metastasis of breast cancer(Levy and Hill, 2006; Massague, 2008; Massague, 2012). Therefore,  
369 we hypothesize that, like Smad4, Arl15 might play a similar dual-role in cancer progression.

370 Although our study mainly focused on the TGF $\beta$  signaling pathway, we observed that Arl15 promotes the  
371 assembly of the BMP Smad-complex (Supplementary Fig. 4), and it is essential for the BMP R-Smad-  
372 dependent transcription (Supplementary Fig. 6d). Therefore, our data indicate that Arl15 also participates  
373 in the BMP signaling pathway. Recent evidence suggests that TGF $\beta$  and BMP pathways play opposite  
374 roles in animal development and diseases(Ning et al., 2019). It has been proposed that competition  
375 between TGF $\beta$  and BMP pathways for Smad4 contributes to their antagonistic cellular effects(Candia et al.,  
376 1997; Sartori et al., 2013; Yuan et al., 2018). Hence, we speculate that, similar to Smad4, Arl15 might  
377 mediate antagonistic crosstalk between the two pathways.

378 Genetic studies have implicated the *ARL15* gene locus in rheumatoid arthritis and multiple metabolic  
379 diseases(Corre et al., 2018; Danila et al., 2013; Glessner et al., 2010; Li et al., 2014; Negi et al., 2013;  
380 Replication et al., 2014; Richards et al., 2009; Ried et al., 2016; Sun et al., 2015; Willer et al., 2013).  
381 Consistent with the broad role of the TGF $\beta$  signaling pathway in physiology and pathology, our findings  
382 raise the likelihood of *ARL15* as the causative gene and suggest the contribution of the TGF $\beta$  family  
383 signaling pathway to the pathology of these metabolic diseases. We hypothesize that the expression level  
384 of *ARL15* might vary in particular genetic background, therefore correspondingly changing the strength of  
385 the TGF $\beta$  family signaling. Indeed, we found that the overexpression and depletion of Arl15 substantially  
386 modulate the TGF $\beta$ -dependent transcription (Fig. 6a-d; Supplementary Fig. 6b,d,j,k). Therefore, our  
387 findings warrant a further investigation of the role of Arl15 in metabolic diseases.



388 **Materials and methods**

389 **DNA plasmids**

390 See Supplementary Table 1.

391

392 **Antibodies, TGF $\beta$  family cytokines, and chemicals**

393 Mouse anti-Smad2/3 mAb (#610842; 1:1000 for Western blot or WB), mouse anti-GM130 mAb (#610823,  
394 1:500 for immunofluorescence or IF) and mouse anti-Golgin245 mAb (#611280, 1:200 for IF) were  
395 purchased from BD Bioscience. Rabbit anti-phospho-Smad2 (S465/467)/Smad3 (S423/425) mAb (#8828;  
396 1:1000 for WB, 1: 200 for IF) and rabbit anti-Flag mAb (#14793; 1:1000 for WB) were purchased from Cell  
397 Signaling Technology. Rabbit anti-Nup133 mAb (#ab155990; 1:1000 for WB) was purchased from Abcam.  
398 The following antibodies were from Santa Cruz: mouse anti-Smad4 mAb (B-8, #sc-7966, 1:1000 for WB),  
399 rabbit anti-Smad1/5/8 polyclonal antibody (pAb) (#sc-6031-R, 1:1000 for WB), rabbit anti-glyceraldehyde  
400 3-phosphate dehydrogenase (GAPDH) pAb (#sc-25778, 1:1000 for WB), mouse anti-GFP mAb (#sc-9996,  
401 1:1000 for WB, 1: 200 for IF), mouse anti-His mAb (#sc-8036, 1:1000 for WB), mouse anti-Myc mAb (#sc-  
402 40, 1:1000 for WB, 1:200 for IF) and mouse anti-HA mAb (#sc-7396, 1:1000 for WB). HRP (horseradish  
403 peroxidase)-conjugated goat anti-mouse (#176516, 1:10,000 for WB) and anti-rabbit IgG antibodies  
404 (#176515, 1:10,000 for WB) were from Bio-Rad. Alexa Fluor conjugated goat anti-mouse (1:500 for IF),  
405 anti-rabbit IgG antibodies (1:500 for IF) and recombinant human BMP2 (#PHC7145) were from Thermo  
406 Fisher Scientific. Recombinant human TGF $\beta$ 1 (#100-21C-10) was purchased from PeproTech. 20  $\mu$ g ml<sup>-1</sup>  
407 stock solution of TGF $\beta$ 1 was made in 4 mM HCl containing 1 mg ml<sup>-1</sup> bovine serum albumin. SB431542  
408 (#1614) and guanosine 5' -[ $\beta$ , $\gamma$ -imido]triphosphate (GMPPNP, #G0635) were purchased from Tocris and  
409 Sigma-Aldrich, respectively.

410

411 **Cell culture and transfection**

412 HeLa, HEK293T, MCF7, and MDA-MB-231 cells were from American Type Culture Collection. 293FT cells  
413 were from Thermo Fisher Scientific. MCF7, MDA-MB-231, HeLa, HEK293T and 293FT cells were  
414 maintained in high glucose Dulbecco's Modified Eagle's Medium (DMEM) supplemented with 10% fetal

415 bovine serum (FBS) (Thermo Fisher Scientific) at 37 °C in a 5% CO<sub>2</sub> incubator. FBS was heat-inactivated  
416 at 55 °C for 30 min. Cells were transfected using polyethylenimine (Polysciences) or Lipofectamine 2000  
417 transfection reagent (Thermo Fisher Scientific).

418

419 During live-cell imaging, transfected HeLa cells grown on a glass-bottom Petri-dish (MatTek Corporation)  
420 were imaged in the CO<sub>2</sub>-independent medium (Thermo Fisher Scientific) supplemented with 4 mM  
421 glutamine and 10% FBS at 37 °C.

422

### 423 **Lentivirus-mediated knockdown and expression**

424 293FT cells grown in a 6-well plate were transfected with shRNA constructs in pLKO.1 vector or pLVX  
425 expression constructs together with pLP1, pLP2, and pLP/VSVG using Lipofectamine 2000 (Thermo Fisher  
426 Scientific). 18 h after transfection, cells were incubated with fresh medium (DMEM supplemented with 10%  
427 FBS) at 37 °C for another 24-48 h. The supernatant of the tissue culture medium was collected, passed  
428 through a 0.45 µm filter (Sartorius), and used immediately. For lentivirus-mediated knockdown or  
429 expression, cells were incubated for 24-48 h with the virus supernatant supplemented with 8 µg ml<sup>-1</sup>  
430 polybrene (Sigma-Aldrich #H9268) before being subjected to further experimental procedures.

431

### 432 **Preparation of recombinant proteins**

433 DNA plasmids encoding recombinant proteins were used to transform BL21 *E coli* bacterial cells. After  
434 induction by isopropyl β-D-1-thiogalactopyranoside, a bacterial cell pellet was collected. For purification of  
435 GST-fusion proteins (those cloned in pGEB or pGEX-KG vectors), cells were lysed using the freeze-thaw  
436 method in a buffer containing 50 mM Tris pH 8.0, 150 mM NaCl, 2 mM dithiothreitol (DTT), 1 mg ml<sup>-1</sup>  
437 lysozyme and 1 mM phenylmethylsulfonyl fluoride (PMSF). The cell lysate was centrifuged at 20,000 g for  
438 30 min, and the resulting supernatant was incubated with Glutathione Sepharose 4B beads (GE Healthcare)  
439 overnight at 4 °C. The beads were washed three times with a buffer containing 50 mM Tris pH 8.0, 0.1%  
440 Triton-X 100, 150 mM NaCl and 2 mM DTT. The bound proteins were eluted using reduced glutathione,  
441 and the resulting eluent was subjected to extensive dialysis against phosphate-buffered saline (PBS).

442 For purification of His-tagged proteins (those cloned in pET30a and pET30ax vectors), bacterial cells were  
443 lysed with a buffer containing 20 mM Tris pH 8.0, 150 mM NaCl, 10 mM imidazole, 2 mM DTT, 1 mg ml<sup>-1</sup>  
444 lysozyme, and 1 mM PMSF and the resulting supernatant was incubated with nickel-nitrilotriacetic acid  
445 agarose (QIAGEN) overnight at 4 °C. The beads were washed with a buffer containing 20 mM Tris pH 8.0,  
446 150 mM NaCl, 20 mM imidazole, and 2 mM DTT and eluted with an elution buffer containing 20 mM Tris  
447 pH 8.0, 150 mM NaCl, 250 mM imidazole, and 2 mM DTT. The eluent was subjected to extensive dialysis  
448 against PBS. All purified proteins were quantified by Coomassie staining in SDS-PAGE.

449

#### 450 **Production of Arl15 antibody**

451 DNA plasmid, His-Arl15-WT in pET30ax, was used to transform BL21 *E coli* cells. After induction by  
452 isopropyl β-D-1-thiogalactopyranoside, the bacterial cell pellet was lysed by sonication in PBS containing  
453 8 M urea. After high-speed centrifugation, the supernatant was incubated with nickel-nitrilotriacetic acid  
454 agarose beads at room temperature for 2 h. The beads were subsequently washed in PBS containing 8 M  
455 urea and 20 mM imidazole. Next, bead-bound His-Arl15-WT was eluted in PBS containing 8 M urea and  
456 250 mM imidazole. After concentrating and changing the buffer to PBS containing 4 M urea, His-Arl15-WT  
457 was sent to Genemed Synthesis Inc for rabbit immunization and antiserum collection. To purify the  
458 polyclonal antibody against Arl15, GST-Arl15 immobilized on glutathione Sepharose beads was incubated  
459 with 50 mM dimethyl pimelimidate (Thermo Fisher Scientific) in 200 mM sodium borate pH 9.0 to crosslink  
460 GST-Arl15 covalently onto glutathione Sepharose beads. The crosslinked beads were subsequently  
461 washed with 200 mM ethanolamine pH 8.0, incubated with the antiserum at room temperature for 1 h and  
462 washed by PBS. Finally, the bound antibody was eluted by 100 mM glycine pH 2.8 and dialyzed against  
463 PBS.

464

#### 465 **Co-IP and GST pull-down**

466 HEK293T cells transfected by indicated DNA constructs were lysed with the lysis buffer (40 mM HEPES  
467 pH 7.4, 150 mM NaCl, 1% Triton X-100, 2.5 mM MgCl<sub>2</sub>, 1 × cComplete™ Protease Inhibitor Cocktail (Roche),  
468 1 mM PMSF, and 1 mM DTT). For co-IP, after centrifugation, the supernatant was incubated with indicated  
469 antibodies overnight at 4 °C. The antibody-antigen complex was captured by incubating with lysis buffer

470 prewashed proteinA/G beads (Thermo Fisher Scientific) for 2 h. In some co-IPs, GFP-Trap beads  
471 (ChromoTek) were used to directly IP GFP-tagged fusion proteins. For GST pull-down, cleared cell lysate  
472 was incubated with bead-immobilized GST-fusion protein for 4 - 14 h at 4 °C. The beads were subsequently  
473 washed with the lysis buffer. Next, the bound protein was eluted by boiling in SDS-sample buffer and  
474 resolved in the SDS-PAGE. SDS-PAGE separated proteins were transferred to polyvinyl difluoride  
475 membrane (Bio-Rad), which was sequentially incubated with the primary and HRP-conjugated secondary  
476 antibody. At last, the chemiluminescence signal was detected by a cooled charge-coupled device using  
477 LAS-4000 (GE Healthcare Life Sciences). Alternatively, the chemiluminescence signal was detected by  
478 CL-XPosure™ film (Thermo Fisher Scientific) and digitally scanned.

479

#### 480 **GTP-agarose pull-down**

481 Transiently transfected HEK293T cells were suspended in a binding buffer (20 mM HEPES, pH7.4, 150  
482 mM NaCl, 1 × cComplete™ Protease Inhibitor Cocktail). After three cycles of freeze-thaw and extrusion  
483 through a 25 ½ gauge needle, the cell lysate was cleared by centrifugation at 16,000 g for 30 min and  
484 subsequently treated with 5 mM EDTA (final concentration) for 1 h at 4 °C. Next, the lysate was incubated  
485 with GTP-agarose beads (bioWORLD) for 1 h in the presence of 10 mM MgCl<sub>2</sub> (final concentration) at 4 °C.  
486 After washing with the binding buffer four times, beads were boiled in the SDS-sample buffer and analyzed  
487 by Western blot.

488

#### 489 **IF**

490 Cells grown on Φ12 mm glass coverslips were fixed with 4% paraformaldehyde in PBS at room temperature  
491 for 20 min and washed with 100 mM ammonium chloride and PBS. Next, cells were sequentially incubated  
492 with primary and fluorescence-conjugated secondary antibodies, which were diluted in the fluorescence  
493 dilution buffer (PBS supplemented with 5% FBS and 2% bovine serum albumin) containing 0.1% saponin  
494 (Sigma-Aldrich). After extensive washing with PBS, coverslips were mounted in the Mowiol mounting  
495 medium, containing 12% Mowiol 4-88 (EMD Millipore), 30% glycerol, and 100 mM Tris pH 8.5.

496

#### 497 **Wide-field fluorescence microscopy**

498 Unless specified, all fluorescence images were acquired under an inverted wide-field fluorescence  
499 microscope (Olympus IX83) equipped with a Plan Apo oil objective lens (63× or 100× oil, NA 1.40), a  
500 motorized stage, motorized filter cubes, a scientific complementary metal oxide semiconductor camera  
501 (Neo; Andor Technology), and a 200 watt metal-halide excitation light source (LumenPro 200; Prior  
502 Scientific). Dichroic mirrors and filters in filter cubes were optimized for Alexa Fluor 488/GFP, 594/mCherry  
503 and 647. The microscope system was controlled by MetaMorph software (Molecular Devices), and only the  
504 center quadrant of the camera sensor was used for imaging. During the live-cell imaging, HeLa cells grown  
505 on a glass-bottom Petri-dish (as described above in Cell culture and transfection) were imaged in a 37 °C  
506 chamber.

507

#### 508 **Laser scanning confocal microscopy**

509 HeLa cells co-expressing mCherry and GFP-tagged proteins were grown on a glass-bottom Petri-dish as  
510 described above (Cell culture and transfection). Live-cell imaging was conducted in a 37°C chamber under  
511 Zeiss LSM710 laser scanning confocal microscope system (Carl Zeiss) equipped with a Plan-apochromat  
512 objective (100x oil, NA 1.40). Two laser lines with wavelengths of 488 nm and 561 nm were used to excite  
513 GFP and mCherry, and their emission filter bandwidths were 495-550 nm and 595-620 nm, respectively.  
514 The microscope system was controlled by ZEN software (Carl Zeiss).

515

#### 516 **Dual-luciferase assay**

517 HeLa cells cultured in 24-well plates were transfected with indicated firefly luciferase reporter construct  
518 (SBE×4-luc or BRE-luc) together with pRL-SV40 renilla luciferase control vector (Promega) using  
519 Lipofectamine 2000 (Thermo Fisher Scientific). Constant amount of total transfected DNA was balanced by  
520 supplying pBluescript SK vector DNA to the transfection mixture. 24 h after transfection, cells were serum-  
521 starved for 4 h and treated with 5 ng ml<sup>-1</sup> TGFβ1 for 20 h. Cells were subsequently lysed, and firefly and  
522 renilla luciferase activities were measured using the Dual-Luciferase Reporter Assay System (Promega)  
523 according to standard protocol.

524

#### 525 **RT-qPCR**

526 Total RNA was extracted from MCF7 or MDA-MB-231 cells using Trizol™ reagent (Thermo Fisher Scientific)  
527 according to the manufacturer's protocol. Reverse transcription primed by random nonamer primers was  
528 conducted using nanoScript 2 Reverse Transcription kit (Primerdesign). The qPCR was performed using  
529 SYBR green based PrecisionFAST kit (Primerdesign) in Bio-Rad CFX96 Touch™ real-time PCR detection  
530 system. Melt curves and agarose gel electrophoresis were performed to confirm the specificity of PCR  
531 primers. The qPCR result of each gene was first divided by that of  $\beta$ -tubulin and further normalized to that  
532 of control (empty vector or GL2-shRNA treatment). Primers for qPCR are as follows: c-Myc (5'-  
533 AAAGGCCCCCAAGGTAGTTA-3'; 5'-GCACAAGAGTTCCGTAGCTG-3'), ID1 (5'-  
534 CAAATTCAAGGTGGAATCGAA-3'; 5'-GGTGGCTGGGAAGTGAAGTGA-3'), p21<sup>cip1</sup> (5'-  
535 GAGGCCGGGATGAGTTGGGAGGAG-3'; 5'-CAGCCGGCGTTTGGAGTGGTAGAA-3'), p27<sup>kip1</sup> (5'-  
536 GCTCCACAGAACCGGCATTT-3'; 5'-AAGCGACCTGCAACCGACGATTCTT-3'), E-cadherin (5'-  
537 TCTTCCCCGCCCTGCCAATC-3'; 5'-GCCTCTCTCGAGTCCCCTAG-3'), N-cadherin (5'-  
538 GGTGGAGGAGAAGAAGACCAG-3'; 5'-GGCATCAGGCTCCACAGT-3'), vimentin (5'-  
539 CTAGGAGCCCTCAATCGG-3'; 5'-CACGGACCTGGTGGACAT-3'),  $\beta$ -tubulin (5'-  
540 TTGCCAGATCTTTAGACCAGACAAC-3'; 5'-CCGTACCACATCCAGGACAGAATC-3') and Arl15 (5'-  
541 CCCCATAACGTCGTGTC-3'; 5'-AGCGGCTCCAGTATTTCC-3').

542 There were some modifications in the experiment described in Fig. 6d. Lentivirus was harvested by  
543 transfecting pMD2.G, psPAX2 together with Arl15-shRNA1, Arl15-shRNA2 or GL2-shRNA in pLKO.1. After  
544 lentivirus infection, pooled MCF7 cells were transiently selected with puromycin. The resulting cells were  
545 treated with 5 ng ml<sup>-1</sup> TGF $\beta$ 1 for 72 h and total RNA was extracted by using Trizol™ reagent and Qiagen  
546 RNeasy Mini Kit (Qiagen) according to the manufacturer's protocol. Reverse transcription primed by  
547 random hexamer primer was conducted using RevertAid H Minus First Strand cDNA Synthesis Kit (Thermo  
548 Fisher Scientific). SensiFAST™ SYBR® Hi-ROX Kit (Bioline) in QuantStudio™ 5 (Thermo Fisher Scientific).  
549 The qPCR result of each gene was first divided by that of ribosomal protein L13A mRNA (Primers: 5'-GCC  
550 TTC ACA GCG TAC GA-3'; 5'-CGA AGA TGG CGG AGG TG-3') and further normalized to that of GL2-  
551 shRNA control.

552

553 **Nuclear fractionation**

554 5 x 10<sup>6</sup> HeLa cells collected by scraping culture flasks were washed three times with ice-cold PBS. After  
555 centrifugation at 200 g for 5 min, pelleted cells were re-suspended in 500 µl buffer A (20 mM Tris pH 7.4,  
556 10 mM NaCl, 3 mM MgCl<sub>2</sub>, 0.5 % NP40, 1 mM DTT and 1 mM PMSF) and incubated on ice for 15 min.  
557 Cells were subsequently vortexed for 10 sec, and the resulting cell lysate was centrifuged for 10 min at  
558 1,000 g at 4 °C. The supernatant, which the non-nuclear or cytoplasmic fraction, was transferred into a new  
559 tube, while the pellet, which is the nuclear fraction, was washed three times using buffer A without NP40.  
560 Both fractions were subjected to the SDS-PAGE and Western blot analysis.

561

### 562 **Image analysis**

563 All image analysis was conducted in ImageJ (<http://imagej.nih.gov/ij/>).

564

### 565 **GAP assay**

566 A similar protocol has been previously described(Pan et al., 2006). Briefly, purified His-Arl15-WT and His-  
567 Arl15-AL proteins were incubated with a 20-fold molar excess of GTP in 20 mM HEPES pH7.5, 150 mM  
568 NaCl, 5 mM ethylenediaminetetraacetic acid, and 1mM DTT at room temperature for 1 h. Next, the proteins  
569 were subjected to a 7 KDa molecular weight cut-off Zeba Spin Desalting Column (Thermo Fisher Scientific),  
570 which was pre-equilibrated with 20 mM HEPES pH7.5 and 150 mM NaCl. The GAP assay was conducted  
571 in a 96-well glass-bottom microplate (Corning), and the released inorganic phosphate was measured using  
572 EnzChek Phosphate Assay Kit (Thermo Fisher Scientific). The reaction system contained 20 mM HEPES  
573 pH 7.5, 150 mM NaCl, 0.15 mM 2-amino-6-mercapto-7-methylpurine ribonucleoside, 0.75 U ml<sup>-1</sup> purine  
574 nucleoside phosphorylase, 10 mM MgCl<sub>2</sub>, 40 µM GTP-loaded His-Arl15-WT or His-Arl15-AL, and 0.4 µM  
575 following GAP candidate proteins, single or in combinations as indicated in text: His-Smad4, His-Smad2-  
576 SE, GST-Smad4, GST-Smad4-MH1, GST-Smad4-linker-MH2, GST-Smad4-MH2, and GST (negative  
577 control). The kinetics of the GTP hydrolysis was continuously monitored by the absorbance at 360 nm in  
578 Cytation 5 (BioTek) at 22 °C. For each time series, absorbance values were subtracted by the  
579 corresponding initial value measured at 0 min.

### 580 **ER-to-Golgi and Golgi export trafficking assays**

581 These assays were performed as previously described (Mahajan et al., 2019). HeLa cells  
582 subjected to lentivirus-transduced shRNA knockdown were further transfected to express a RUSH  
583 reporter: li-Strep\_ManII-SBP-GFP or li-Strep\_TNF $\alpha$ -SBP-GFP (Boncompain et al., 2012) for the  
584 ER-to-Golgi or Golgi export to the PM transport assay. 50 ng ml<sup>-1</sup> streptavidin was added to cell  
585 culture and was removed 20 h after transfection of RUSH reporters. For the ER-to-Golgi trafficking  
586 assay, 40  $\mu$ M biotin and 10  $\mu$ g ml<sup>-1</sup> cycloheximide were added to the cell medium during the  
587 chase. For the Golgi export trafficking assay, cells were first incubated at 20 °C for 3 h in the  
588 presence of 40  $\mu$ M biotin and 10  $\mu$ g ml<sup>-1</sup> cycloheximide to accumulate TNF $\alpha$ -SBP-GFP at the  
589 Golgi. The system was subsequently warmed up to 37 °C during the chase. In both assays, cells  
590 were processed for immunofluorescence at various chase times and imaged by the wide-field  
591 microscope. The Golgi fraction of RUSH reporter is calculated using  $I_{\text{Golgi}}/I_{\text{cell}}$ , in which  $I_{\text{Golgi}}$  and  
592  $I_{\text{cell}}$  are integrated GFP intensity of the Golgi and the cell, respectively. All cells positively  
593 expressing RUSH reporter were analyzed in each image.

594

#### 595 **Cancer mutation data of Arl15**

596 Cancer mutation data of Arl15 were manually compiled from cBioPortal (<https://www.cbioportal.org/>) and  
597 COSMIC (<https://cancer.sanger.ac.uk/cosmic/gene/analysis?In=ARL15>).

598

#### 599 **Wound healing migration assay**

600 MDA-MB-231 cells were first subjected to lentivirus-transduced knockdown using GL2-shRNA, Arl15-  
601 shRNA1, or 2. Next, cells were cultured to confluence in 6-well plates. Gaps were scratched across a well  
602 using a pipette tip, and the closure of gaps was kinetically monitored by an inverted phase contrast  
603 microscope. The widths of gaps were quantified using ImageJ (<https://imagej.nih.gov/ij/>). The percentage  
604 of the relative migration was calculated as  $(1-d/d_0)*100\%$ , in which  $d_0$  is the initial width of the gap and  $d$  is  
605 the width of the gap at a specific time.

606

#### 607 **Invasion assay**



608 MDA-MB-231 cells were first subjected to lentivirus-transduced knockdown using GL2, Arl15-shRNA1, or  
609 2. After cells were serum-starved for 24 h in DMEM, the same amount of suspended cells were added into  
610 upper chambers of Corning Costar Transwell cell culture inserts (pore size 8  $\mu\text{m}$ ; Sigma-Aldrich, #CLS3464)  
611 with the coating of 30  $\mu\text{g}$  Matrigel™ Basement Membrane Matrix (BD Biosciences). 700  $\mu\text{l}$  DMEM  
612 supplemented with 10 % FBS was added into the lower chamber. After 24 h incubation at 37°C in a CO<sub>2</sub>  
613 incubator, the upper chamber was washed three times with PBS, fixed with ice-cold methanol, and stained  
614 with crystal violet solution (0.5 % crystal violet in 20 % methanol). Finally, cells on the upper surface of the  
615 insert were removed with a cotton swab, and those on the lower surface (translocated cells) were imaged.  
616 In each experiment, five randomly selected fields were imaged, and the number of cells within each image  
617 was counted and averaged. The relative invasion was calculated as the number of cells per image  
618 normalized by that of control (GL2-shRNA treated).

619

#### 620 **Author contributions**

621 LL conceived the study. LL and LV supervised the study. LL and MS designed experiments. MS conducted  
622 the majority of experiments. HCT performed the experiments for Fig. 1a,b, and Supplementary Fig. 1b,c.  
623 HCT and XS contributed to Fig. 2 experiments. MD did the experiments for Supplementary Fig. 6e-h. YZ  
624 identified Smad4 as a potential Arl15 effector via the yeast-two hybrid screening. YZ and BKH confirmed  
625 the interaction between Arl15 and Smad4. MS and LL analyzed data and prepared figures. LL wrote the  
626 manuscript.

627

#### 628 **Acknowledgments**

629 We would like to thank Z. Ding (Temasek Polytechnic, Singapore) for the help in the yeast-two hybrid  
630 screening and R. Derynck (University of California San Francisco, USA), P. ten Dijke (Leids Universitair  
631 Medisch Centrum, Netherlands), W. Hong (Institute of Molecular and Cell Biology, Singapore), T.  
632 Kirchhausen (Harvard Medical School, USA), M. Lowe (University of Manchester, UK), F. Perez (Institut  
633 Curie, France), D. Trono (EPFL, Switzerland), D. Root (Broad Institute, USA), M. Roussel (St. Jude

634 Children's Research Hospital, USA) for sharing DNA plasmids. This work was supported by the following  
635 grants to L.L.: MOE AcRF Tier1 RG35/17, Tier2 MOE2015-T2-2-073, and MOE2018-T2-2-026.

636 **List of Supplementary Materials**

637 Supplementary Table 1

638 Supplementary Fig. 1-7

639 **References**

- 640 Antonny, B., D. Madden, S. Hamamoto, L. Orci, and R. Schekman. 2001. Dynamics of the COPII coat with  
641 GTP and stable analogues. *Nat Cell Biol.* 3:531-537.
- 642 Bi, X., R.A. Corpina, and J. Goldberg. 2002. Structure of the Sec23/24-Sar1 pre-budding complex of the  
643 COPII vesicle coat. *Nature.* 419:271-277.
- 644 Bi, X., J.D. Mancias, and J. Goldberg. 2007. Insights into COPII coat nucleation from the structure of  
645 Sec23.Sar1 complexed with the active fragment of Sec31. *Dev Cell.* 13:635-645.
- 646 Boncompain, G., S. Divoux, N. Gareil, H. de Forges, A. Lescure, L. Latreche, V. Mercanti, F. Jollivet, G.  
647 Raposo, and F. Perez. 2012. Synchronization of secretory protein traffic in populations of cells.  
648 *Nat Methods.* 9:493-498.
- 649 Candia, A.F., T. Watabe, S.H. Hawley, D. Onichtchouk, Y. Zhang, R. Derynck, C. Niehrs, and K.W. Cho.  
650 1997. Cellular interpretation of multiple TGF-beta signals: intracellular antagonism between  
651 activin/BVg1 and BMP-2/4 signaling mediated by Smads. *Development.* 124:4467-4480.
- 652 Chacko, B.M., B. Qin, J.J. Correia, S.S. Lam, M.P. de Caestecker, and K. Lin. 2001. The L3 loop and C-  
653 terminal phosphorylation jointly define Smad protein trimerization. *Nat Struct Biol.* 8:248-253.
- 654 Chacko, B.M., B.Y. Qin, A. Tiwari, G. Shi, S. Lam, L.J. Hayward, M. De Caestecker, and K. Lin. 2004.  
655 Structural basis of heteromeric smad protein assembly in TGF-beta signaling. *Mol Cell.* 15:813-  
656 823.
- 657 Chen, Y.G., Z. Wang, J. Ma, L. Zhang, and Z. Lu. 2007. Endofin, a FYVE domain protein, interacts with  
658 Smad4 and facilitates transforming growth factor-beta signaling. *J Biol Chem.* 282:9688-9695.
- 659 Cherfils, J., and M. Zeghouf. 2013. Regulation of small GTPases by GEFs, GAPs, and GDIs. *Physiol Rev.*  
660 93:269-309.
- 661 Comsa, S., A.M. Cimpean, and M. Raica. 2015. The Story of MCF-7 Breast Cancer Cell Line: 40 years of  
662 Experience in Research. *Anticancer Res.* 35:3147-3154.
- 663 Corre, T., F.J. Arjona, C. Hayward, S. Youhanna, J.H.F. de Baaij, H. Belge, N. Nagele, H. Debaix, M.G.  
664 Blanchard, M. Traglia, S.E. Harris, S. Ulivi, R. Rueedi, D. Lamparter, A. Mace, C. Sala, S.  
665 Lenarduzzi, B. Ponte, M. Pruijm, D. Ackermann, G. Ehret, D. Baptista, O. Polasek, I. Rudan, T.W.  
666 Hurd, N.D. Hastie, V. Vitart, G. Waeber, Z. Kutalik, S. Bergmann, R. Vargas-Poussou, M. Konrad,  
667 P. Gasparini, I.J. Deary, J.M. Starr, D. Toniolo, P. Vollenweider, J.G.J. Hoenderop, R.J.M. Bindels,  
668 M. Bochud, and O. Devuyst. 2018. Genome-Wide Meta-Analysis Unravels Interactions between  
669 Magnesium Homeostasis and Metabolic Phenotypes. *J Am Soc Nephrol.* 29:335-348.
- 670 Danielpour, D., K.Y. Kim, L.L. Dart, S. Watanabe, A.B. Roberts, and M.B. Sporn. 1989. Sandwich enzyme-  
671 linked immunosorbent assays (SELISAs) quantitate and distinguish two forms of transforming  
672 growth factor-beta (TGF-beta 1 and TGF-beta 2) in complex biological fluids. *Growth Factors.*  
673 2:61-71.
- 674 Danila, M.I., R.J. Reynolds, H.K. Tiwari, and S.L. Bridges, Jr. 2013. Ethnic-specific genetic analyses in  
675 rheumatoid arthritis: incremental gains but valuable contributions to the big picture. *Arthritis*  
676 *Rheum.* 65:3014-3016.
- 677 Deckers, M., M. van Dinther, J. Buijs, I. Que, C. Lowik, G. van der Pluijm, and P. ten Dijke. 2006. The  
678 tumor suppressor Smad4 is required for transforming growth factor beta-induced epithelial to  
679 mesenchymal transition and bone metastasis of breast cancer cells. *Cancer Res.* 66:2202-2209.
- 680 Derynck, R., and E.H. Budi. 2019. Specificity, versatility, and control of TGF- $\beta$  family signaling. *Science*  
681 *Signaling.* 12:eaav5183.
- 682 Donaldson, J.G., and C.L. Jackson. 2011. ARF family G proteins and their regulators: roles in membrane  
683 transport, development and disease. *Nat Rev Mol Cell Biol.* 12:362-375.
- 684 Feig, L.A. 1999. Tools of the trade: use of dominant-inhibitory mutants of Ras-family GTPases. *Nat Cell*  
685 *Biol.* 1:E25-27.

- 686 Gillooly, D.J., A. Simonsen, and H. Stenmark. 2001. Cellular functions of phosphatidylinositol 3-  
687 phosphate and FYVE domain proteins. *Biochem J.* 355:249-258.
- 688 Glessner, J.T., J.P. Bradfield, K. Wang, N. Takahashi, H. Zhang, P.M. Sleiman, F.D. Mentch, C.E. Kim, C.  
689 Hou, K.A. Thomas, M.L. Garris, S. Deliard, E.C. Frackelton, F.G. Otiemo, J. Zhao, R.M. Chiavacci, M.  
690 Li, J.D. Buxbaum, R.I. Berkowitz, H. Hakonarson, and S.F. Grant. 2010. A genome-wide study  
691 reveals copy number variants exclusive to childhood obesity cases. *Am J Hum Genet.* 87:661-  
692 666.
- 693 Goumans, M.J., and P. Ten Dijke. 2018. TGF-beta Signaling in Control of Cardiovascular Function. *Cold  
694 Spring Harb Perspect Biol.* 10.
- 695 Hao, Y., D. Baker, and P. Ten Dijke. 2019. TGF-beta-Mediated Epithelial-Mesenchymal Transition and  
696 Cancer Metastasis. *Int J Mol Sci.* 20.
- 697 Hata, A., R.S. Lo, D. Wotton, G. Lagna, and J. Massague. 1997. Mutations increasing autoinhibition  
698 inactivate tumour suppressors Smad2 and Smad4. *Nature.* 388:82-87.
- 699 Holliday, D.L., and V. Speirs. 2011. Choosing the right cell line for breast cancer research. *Breast Cancer  
700 Res.* 13:215.
- 701 Kim, K.K., D. Sheppard, and H.A. Chapman. 2018. TGF-beta1 Signaling and Tissue Fibrosis. *Cold Spring  
702 Harb Perspect Biol.* 10.
- 703 Korchynskyi, O., and P. ten Dijke. 2002. Identification and functional characterization of distinct critically  
704 important bone morphogenetic protein-specific response elements in the Id1 promoter. *Journal  
705 of Biological Chemistry.* 277:4883-4891.
- 706 Kretzschmar, M., F. Liu, A. Hata, J. Doody, and J. Massague. 1997. The TGF-beta family mediator Smad1  
707 is phosphorylated directly and activated functionally by the BMP receptor kinase. *Genes Dev.*  
708 11:984-995.
- 709 Lamouille, S., J. Xu, and R. Derynck. 2014. Molecular mechanisms of epithelial-mesenchymal transition.  
710 *Nat Rev Mol Cell Biol.* 15:178-196.
- 711 Laping, N.J., E. Grygielko, A. Mathur, S. Butter, J. Bomberger, C. Tweed, W. Martin, J. Fornwald, R. Lehr,  
712 J. Harling, L. Gaster, J.F. Callahan, and B.A. Olson. 2002. Inhibition of transforming growth factor  
713 (TGF)-beta1-induced extracellular matrix with a novel inhibitor of the TGF-beta type I receptor  
714 kinase activity: SB-431542. *Mol Pharmacol.* 62:58-64.
- 715 Levy, L., and C.S. Hill. 2006. Alterations in components of the TGF-beta superfamily signaling pathways in  
716 human cancer. *Cytokine Growth Factor Rev.* 17:41-58.
- 717 Li, Y., Y. Yang, Y. Yao, X. Li, L. Shi, Y. Zhang, Y. Xiong, M. Yan, Y. Yao, and C. Xiao. 2014. Association study  
718 of ARL15 and CDH13 with T2DM in a Han Chinese population. *Int J Med Sci.* 11:522-527.
- 719 Liu, X., Y. Sun, S.N. Constantinescu, E. Karam, R.A. Weinberg, and H.F. Lodish. 1997. Transforming growth  
720 factor beta-induced phosphorylation of Smad3 is required for growth inhibition and  
721 transcriptional induction in epithelial cells. *Proc Natl Acad Sci U S A.* 94:10669-10674.
- 722 Mahajan, D., H.C. Tie, B. Chen, and L. Lu. 2019. Dopey1-Mon2 complex binds to dual-lipids and recruits  
723 kinesin-1 for membrane trafficking. *Nat Commun.* 10:3218.
- 724 Massague, J. 2008. TGFbeta in Cancer. *Cell.* 134:215-230.
- 725 Massague, J. 2012. TGFbeta signalling in context. *Nat Rev Mol Cell Biol.* 13:616-630.
- 726 Negi, S., G. Juyal, S. Senapati, P. Prasad, A. Gupta, S. Singh, S. Kashyap, A. Kumar, U. Kumar, R. Gupta, S.  
727 Kaur, S. Agrawal, A. Aggarwal, J. Ott, S. Jain, R.C. Juyal, and B.K. Thelma. 2013. A genome-wide  
728 association study reveals ARL15, a novel non-HLA susceptibility gene for rheumatoid arthritis in  
729 North Indians. *Arthritis Rheum.* 65:3026-3035.
- 730 Ning, J., Y. Zhao, Y. Ye, and J. Yu. 2019. Opposing roles and potential antagonistic mechanism between  
731 TGF-beta and BMP pathways: Implications for cancer progression. *EBioMedicine.* 41:702-710.
- 732 Pan, X., S. Eathiraj, M. Munson, and D.G. Lambright. 2006. TBC-domain GAPs for Rab GTPases accelerate  
733 GTP hydrolysis by a dual-finger mechanism. *Nature.* 442:303-306.

- 734 Qing, J., C. Liu, L. Choy, R.Y. Wu, J.S. Pagano, and R. Derynck. 2004. Transforming growth factor  
735 beta/Smad3 signaling regulates IRF-7 function and transcriptional activation of the beta  
736 interferon promoter. *Mol Cell Biol.* 24:1411-1425.
- 737 Replication, D.I.G., C. Meta-analysis, C. Asian Genetic Epidemiology Network Type 2 Diabetes, C. South  
738 Asian Type 2 Diabetes, C. Mexican American Type 2 Diabetes, C. Type 2 Diabetes Genetic  
739 Exploration by Nex-generation sequencing in muylti-Ethnic Samples, A. Mahajan, M.J. Go, W.  
740 Zhang, J.E. Below, K.J. Gaulton, T. Ferreira, M. Horikoshi, A.D. Johnson, M.C. Ng, I. Prokopenko,  
741 D. Saleheen, X. Wang, E. Zeggini, G.R. Abecasis, L.S. Adair, P. Almgren, M. Atalay, T. Aung, D.  
742 Baldassarre, B. Balkau, Y. Bao, A.H. Barnett, I. Barroso, A. Basit, L.F. Been, J. Beilby, G.I. Bell, R.  
743 Benediktsson, R.N. Bergman, B.O. Boehm, E. Boerwinkle, L.L. Bonnycastle, N. Burt, Q. Cai, H.  
744 Campbell, J. Carey, S. Cauchi, M. Caulfield, J.C. Chan, L.C. Chang, T.J. Chang, Y.C. Chang, G.  
745 Charpentier, C.H. Chen, H. Chen, Y.T. Chen, K.S. Chia, M. Chidambaram, P.S. Chines, N.H. Cho,  
746 Y.M. Cho, L.M. Chuang, F.S. Collins, M.C. Cornelis, D.J. Couper, A.T. Crenshaw, R.M. van Dam, J.  
747 Danesh, D. Das, U. de Faire, G. Dedoussis, P. Deloukas, A.S. Dimas, C. Dina, A.S. Doney, P.J.  
748 Donnelly, M. Dorkhan, C. van Duijn, J. Dupuis, S. Edkins, P. Elliott, V. Emilsson, R. Erbel, J.G.  
749 Eriksson, J. Escobedo, T. Esko, E. Eury, J.C. Florez, P. Fontanillas, N.G. Forouhi, T. Forsen, C. Fox,  
750 R.M. Fraser, T.M. Frayling, P. Froguel, P. Frossard, Y. Gao, K. Gertow, C. Gieger, B. Gigante, H.  
751 Grallert, G.B. Grant, L.C. Grrop, C.J. Groves, et al. 2014. Genome-wide trans-ancestry meta-  
752 analysis provides insight into the genetic architecture of type 2 diabetes susceptibility. *Nat*  
753 *Genet.* 46:234-244.
- 754 Richards, J.B., D. Waterworth, S. O'Rahilly, M.F. Hivert, R.J. Loos, J.R. Perry, T. Tanaka, N.J. Timpson, R.K.  
755 Semple, N. Soranzo, K. Song, N. Rocha, E. Grundberg, J. Dupuis, J.C. Florez, C. Langenberg, I.  
756 Prokopenko, R. Saxena, R. Sladek, Y. Aulchenko, D. Evans, G. Waeber, J. Erdmann, M.S. Burnett,  
757 N. Sattar, J. Devaney, C. Willenborg, A. Hingorani, J.C. Witteman, P. Vollenweider, B. Glaser, C.  
758 Hengstenberg, L. Ferrucci, D. Melzer, K. Stark, J. Deanfield, J. Winogradow, M. Grassl, A.S. Hall,  
759 J.M. Egan, J.R. Thompson, S.L. Ricketts, I.R. Konig, W. Reinhard, S. Grundy, H.E. Wichmann, P.  
760 Barter, R. Mahley, Y.A. Kesaniemi, D.J. Rader, M.P. Reilly, S.E. Epstein, A.F. Stewart, C.M. Van  
761 Duijn, H. Schunkert, K. Burling, P. Deloukas, T. Pastinen, N.J. Samani, R. McPherson, G. Davey  
762 Smith, T.M. Frayling, N.J. Wareham, J.B. Meigs, V. Mooser, T.D. Spector, and G. Consortium.  
763 2009. A genome-wide association study reveals variants in ARL15 that influence adiponectin  
764 levels. *PLoS Genet.* 5:e1000768.
- 765 Ried, J.S., M.J. Jeff, A.Y. Chu, J.L. Bragg-Gresham, J. van Dongen, J.E. Huffman, T.S. Ahluwalia, G. Cadby,  
766 N. Eklund, J. Eriksson, T. Esko, M.F. Feitosa, A. Goel, M. Gorski, C. Hayward, N.L. Heard-Costa,  
767 A.U. Jackson, E. Jokinen, S. Kanoni, K. Kristiansson, Z. Kutalik, J. Lahti, J. Luan, R. Magi, A.  
768 Mahajan, M. Mangino, C. Medina-Gomez, K.L. Monda, I.M. Nolte, L. Perusse, I. Prokopenko, L.  
769 Qi, L.M. Rose, E. Salvi, M.T. Smith, H. Snieder, A. Stancakova, Y. Ju Sung, I. Tachmazidou, A.  
770 Teumer, G. Thorleifsson, P. van der Harst, R.W. Walker, S.R. Wang, S.H. Wild, S.M. Willems, A.  
771 Wong, W. Zhang, E. Albrecht, A. Couto Alves, S.J. Bakker, C. Barlassina, T.M. Bartz, J. Beilby, C.  
772 Bellis, R.N. Bergman, S. Bergmann, J. Blangero, M. Bluher, E. Boerwinkle, L.L. Bonnycastle, S.R.  
773 Bornstein, M. Bruinenberg, H. Campbell, Y.I. Chen, C.W. Chiang, P.S. Chines, F.S. Collins, F.  
774 Cucca, L.A. Cupples, F. D'Avila, E.J. de Geus, G. Dedoussis, M. Dimitriou, A. Doring, J.G. Eriksson,  
775 A.E. Farmaki, M. Farrall, T. Ferreira, K. Fischer, N.G. Forouhi, N. Friedrich, A.P. Gjesing, N.  
776 Glorioso, M. Graff, H. Grallert, N. Grarup, J. Grasser, J. Grewal, A. Hamsten, M.N. Harder, C.A.  
777 Hartman, M. Hassinen, N. Hastie, A.T. Hattersley, A.S. Havulinna, M. Heliövaara, H. Hillege, A.  
778 Hofman, O. Holmen, et al. 2016. A principal component meta-analysis on multiple  
779 anthropometric traits identifies novel loci for body shape. *Nat Commun.* 7:13357.

- 780 Rocha, N., F. Payne, I. Huang-Doran, A. Sleight, K. Fawcett, C. Adams, A. Stears, V. Saudek, S. O'Rahilly, I.  
781 Barroso, and R.K. Semple. 2017. The metabolic syndrome- associated small G protein ARL15  
782 plays a role in adipocyte differentiation and adiponectin secretion. *Sci Rep.* 7:17593.
- 783 Sartori, R., E. Schirwis, B. Blaauw, S. Bortolanza, J. Zhao, E. Enzo, A. Stantzou, E. Mouisel, L. Toniolo, A.  
784 Ferry, S. Stricker, A.L. Goldberg, S. Dupont, S. Piccolo, H. Amthor, and M. Sandri. 2013. BMP  
785 signaling controls muscle mass. *Nat Genet.* 45:1309-1318.
- 786 Schmierer, B., and C.S. Hill. 2007. TGFbeta-SMAD signal transduction: molecular specificity and  
787 functional flexibility. *Nat Rev Mol Cell Biol.* 8:970-982.
- 788 Seet, L.F., and W. Hong. 2001. Endofin, an endosomal FYVE domain protein. *J Biol Chem.* 276:42445-  
789 42454.
- 790 Seoane, J., and R.R. Gomis. 2017. TGF-beta Family Signaling in Tumor Suppression and Cancer  
791 Progression. *Cold Spring Harb Perspect Biol.* 9.
- 792 Shi, M., B. Chen, D. Mahajan, B.K. Boh, Y. Zhou, B. Dutta, H.C. Tie, S.K. Sze, G. Wu, and L. Lu. 2018. Amino  
793 acids stimulate the endosome-to-Golgi trafficking through Ragulator and small GTPase Arl5. *Nat*  
794 *Commun.* 9:4987.
- 795 Shi, W., C. Chang, S. Nie, S. Xie, M. Wan, and X. Cao. 2007. Endofin acts as a Smad anchor for receptor  
796 activation in BMP signaling. *J Cell Sci.* 120:1216-1224.
- 797 Sun, J.Q., R.X. Yin, G.Y. Shi, S.W. Shen, X. Chen, Y. Bin, F. Huang, W. Wang, W.X. Lin, and S.L. Pan. 2015.  
798 Association of the ARL15 rs6450176 SNP and serum lipid levels in the Jing and Han populations.  
799 *Int J Clin Exp Pathol.* 8:12977-12994.
- 800 Sztul, E., P.W. Chen, J.E. Casanova, J. Cherfils, J.B. Dacks, D.G. Lambright, F.S. Lee, P.A. Randazzo, L.C.  
801 Santy, A. Schurmann, I. Wilhelmi, M.E. Yohe, and R.A. Kahn. 2019. ARF GTPases and their GEFs  
802 and GAPs: concepts and challenges. *Mol Biol Cell.* 30:1249-1271.
- 803 Tsukazaki, T., T.A. Chiang, A.F. Davison, L. Attisano, and J.L. Wrana. 1998. SARA, a FYVE domain protein  
804 that recruits Smad2 to the TGFbeta receptor. *Cell.* 95:779-791.
- 805 Vetter, I.R., and A. Wittinghofer. 2001. The guanine nucleotide-binding switch in three dimensions.  
806 *Science.* 294:1299-1304.
- 807 Willer, C.J., E.M. Schmidt, S. Sengupta, G.M. Peloso, S. Gustafsson, S. Kanoni, A. Ganna, J. Chen, M.L.  
808 Buchkovich, S. Mora, J.S. Beckmann, J.L. Bragg-Gresham, H.Y. Chang, A. Demirkan, H.M. Den  
809 Hertog, R. Do, L.A. Donnelly, G.B. Ehret, T. Esko, M.F. Feitosa, T. Ferreira, K. Fischer, P.  
810 Fontanillas, R.M. Fraser, D.F. Freitag, D. Gurdasani, K. Heikkila, E. Hypponen, A. Isaacs, A.U.  
811 Jackson, A. Johansson, T. Johnson, M. Kaakinen, J. Kettunen, M.E. Kleber, X. Li, J. Luan, L.P.  
812 Lyytikainen, P.K.E. Magnusson, M. Mangino, E. Mihailov, M.E. Montasser, M. Muller-Nurasyid,  
813 I.M. Nolte, J.R. O'Connell, C.D. Palmer, M. Perola, A.K. Petersen, S. Sanna, R. Saxena, S.K. Service,  
814 S. Shah, D. Shungin, C. Sidore, C. Song, R.J. Strawbridge, I. Surakka, T. Tanaka, T.M. Teslovich, G.  
815 Thorleifsson, E.G. Van den Herik, B.F. Voight, K.A. Volcik, L.L. Waite, A. Wong, Y. Wu, W. Zhang,  
816 D. Absher, G. Asiki, I. Barroso, L.F. Been, J.L. Bolton, L.L. Bonnycastle, P. Brambilla, M.S. Burnett,  
817 G. Cesana, M. Dimitriou, A.S.F. Doney, A. Doring, P. Elliott, S.E. Epstein, G. Ingi Eyjolfsson, B.  
818 Gigante, M.O. Goodarzi, H. Grallert, M.L. Gravito, C.J. Groves, G. Hallmans, A.L. Hartikainen, C.  
819 Hayward, D. Hernandez, A.A. Hicks, H. Holm, Y.J. Hung, T. Illig, M.R. Jones, P. Kaleebu, J.J.P.  
820 Kastelein, K.T. Khaw, E. Kim, et al. 2013. Discovery and refinement of loci associated with lipid  
821 levels. *Nat Genet.* 45:1274-1283.
- 822 Wrana, J.L. 2013. Signaling by the TGFbeta superfamily. *Cold Spring Harb Perspect Biol.* 5:a011197.
- 823 Wu, J.W., R. Fairman, J. Penry, and Y. Shi. 2001. Formation of a stable heterodimer between Smad2 and  
824 Smad4. *J Biol Chem.* 276:20688-20694.
- 825 Yuan, G., Y. Zhan, X. Gou, Y. Chen, and G. Yang. 2018. TGF-beta signaling inhibits canonical BMP signaling  
826 pathway during palate development. *Cell Tissue Res.* 371:283-291.

- 827 Zawel, L., J.L. Dai, P. Buckhaults, S. Zhou, K.W. Kinzler, B. Vogelstein, and S.E. Kern. 1998. Human Smad3  
828 and Smad4 are sequence-specific transcription activators. *Mol Cell*. 1:611-617.
- 829 Zhao, J., M. Wang, W. Deng, D. Zhong, Y. Jiang, Y. Liao, B. Chen, and X. Zhang. 2017. ADP-ribosylation  
830 factor-like GTPase 15 enhances insulin-induced AKT phosphorylation in the IR/IRS1/AKT  
831 pathway by interacting with ASAP2 and regulating PDPK1 activity. *Biochem Biophys Res  
832 Commun*. 486:865-871.
- 833

Figure 1

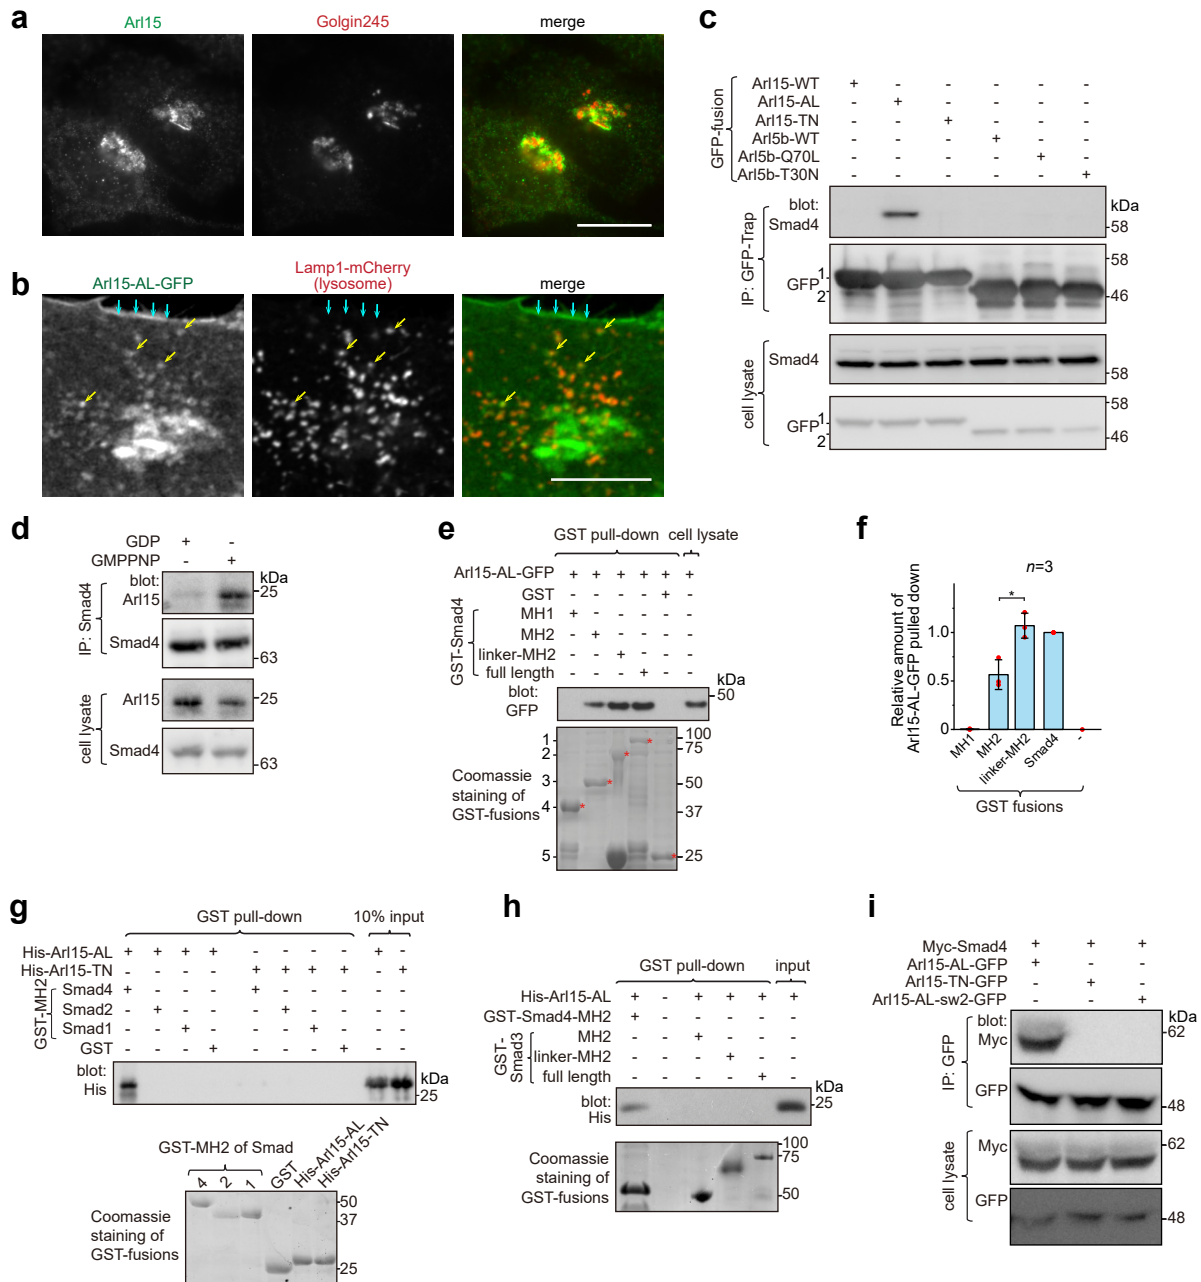



834 **Figure legends**

835 **Figure 1** Arl15-GTP interacts with Smad4. **a** Endogenous Arl15 and Golgin245 were stained by  
836 immunofluorescence in HeLa cells. Images were acquired by a wide-field microscope. **b** Arl15-AL-GFP  
837 localizes to the lysosome. Live HeLa cells transiently co-expressing Arl15-AL-GFP and Lamp1-mCherry  
838 were imaged under a confocal microscope. Yellow arrows, colocalized puncta; cyan arrows, PM. Scale bar,  
839 10  $\mu$ m. **c** The GTP-mutant form of Arl15 specifically co-IPed endogenous Smad4. HEK293T cell lysates  
840 transiently expressing C-terminally GFP-tagged small G proteins were incubated with GFP-Trap beads,  
841 and IPs were immunoblotted against Smad4, and GFP. 1 and 2 indicate Arl15-(WT, AL or TN)-GFP and  
842 Arl5b-(WT, Q70L or T30N)-GFP bands, respectively. Arl5b serves as a negative control. **d** Endogenous  
843 Smad4 co-IPed Arl15 in the presence of GMPPNP, but not GDP. HEK293T cell lysates were incubated  
844 with anti-Smad4 antibody in the presence of 1  $\mu$ M GMPPNP or GDP, and IPs were immunoblotted against  
845 Arl15 and Smad4. **e,f** The Smad4-MH2 domain specifically pulled down the GTP-mutant form of Arl15. In  
846 **e**, bead-immobilized GST-fusions of Smad4 fragments were incubated with HEK293T cell lysate expressing  
847 Arl15-AL-GFP, and pull-downs were immunoblotted against GFP. The loading of GST-fusions was shown  
848 below by Coomassie staining. 1, GST-Smad4; 2, GST-Smad4-linker-MH2; 3, GST-Smad4-MH2, 4, GST-  
849 Smad4-MH1 and 5, GST. \* indicates specific band. The immunoblot is quantified in **f**, in which the relative  
850 amount of Arl15-AL-GFP pulled down is calculated as the ratio of the intensity of the pull-down band to that  
851 of the cell lysate input band. Error bar, mean  $\pm$  SD of  $n = 3$  experiments.  $p$  values are from the  $t$ -test  
852 (unpaired and two-tailed). \*,  $p \leq 0.05$ . Red dot, individual data point. **g, h** MH2 domain of Smad4, but not  
853 that of Smad1, 2, and 3, directly interacts with the GTP-mutant form of Arl15. Bead-immobilized GST-  
854 fusions of MH2 domains were incubated with purified His-tagged Arl15-AL or TN, and pull-downs were  
855 immunoblotted against His-Tag. Loading of fusion proteins was shown by Coomassie staining. **i** Switch-II  
856 region of Arl15 is required for its interaction with Smad4. HEK293T cell lysates expressing indicated  
857 proteins were incubated with GFP antibody, and IPs were immunoblotted against Myc-tag and GFP. In  
858 Arl15-AL-sw2-GFP, the switch-II region of Arl15-AL-GFP is replaced by that of Arl5b. Molecular weights (in  
859 kDa) are labeled in all immunoblots.

860

## Figure 2

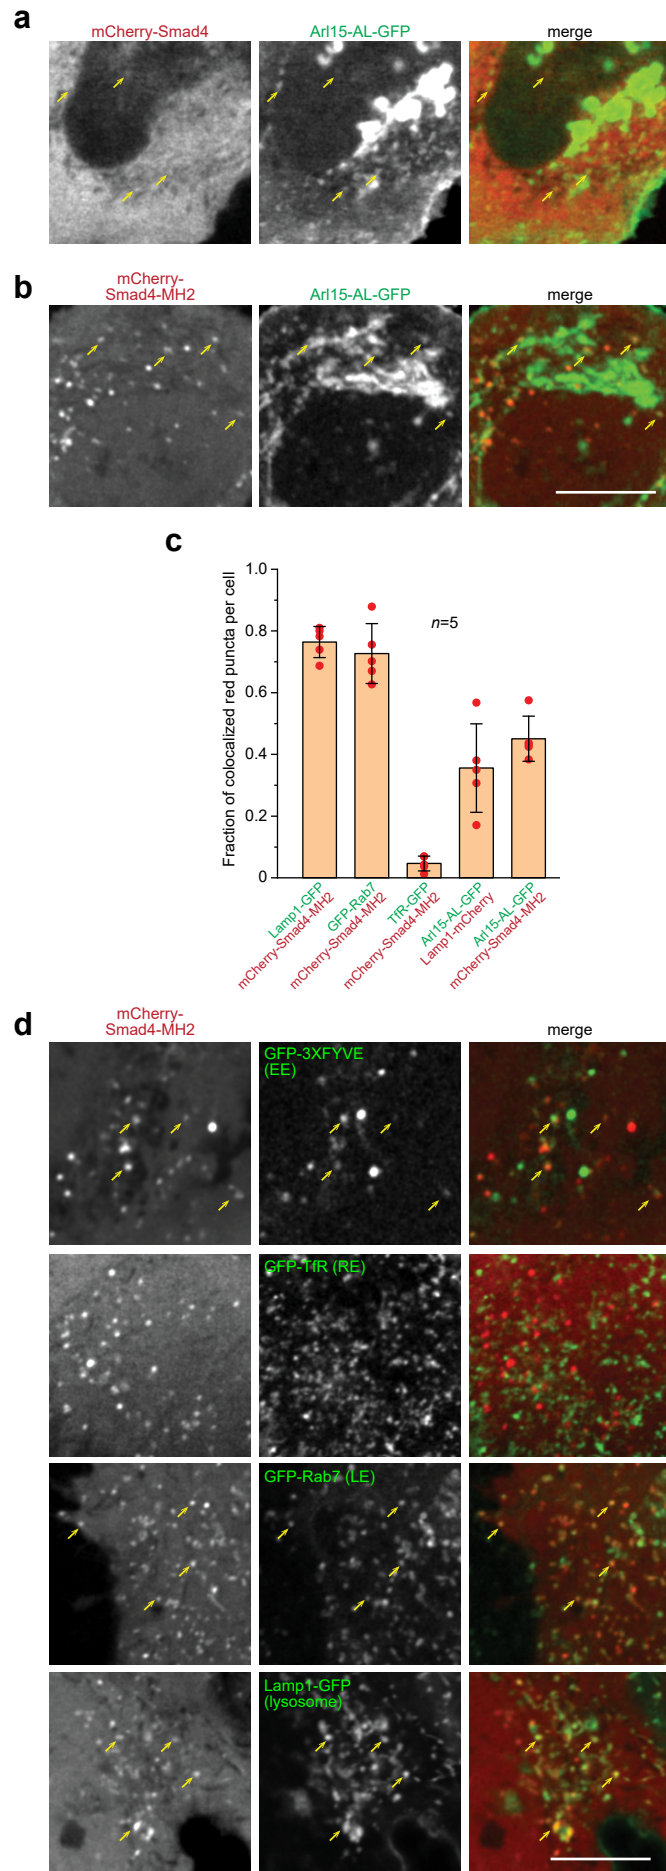

861 **Figure 2** Smad4 colocalizes with the GTP-mutant form of Arl15 at the endolysosome. HeLa cells  
862 under the normal culture condition were used. **a,b** Smad4-MH2 displays better colocalization with the GTP-  
863 mutant form of Arl15 than full-length Smad4 at the endolysosome. Live HeLa cells co-expressing indicated  
864 mCherry and GFP-tagged proteins were imaged under a confocal microscope. Note that they colocalize at  
865 the endolysosome but not the Golgi. **c** Quantitative colocalization between Smad4-MH2 and various  
866 endolysosome markers.  $n = 5$  cells were imaged, and all red puncta (mCherry-Smad4-MH2 or Lamp1-  
867 mCherry) within each image were examined. Fractions of red puncta that visually colocalize with green  
868 puncta were calculated and plotted. Error bar, mean  $\pm$  SD ( $n = 5$  cells). Red dot, individual data point. **d**  
869 Smad4-MH2 localizes to the EE, LE, and lysosome, but not the RE. Live HeLa cells co-expressing indicated  
870 mCherry and GFP-tagged proteins were imaged under the confocal microscope. GFP-tagged 3  $\times$  FYVE,  
871 TfR, Rab7, and Lamp1 are markers for the EE, RE, LE, and lysosome, respectively. Scale bar, 10  $\mu$ m.  
872 Arrows indicate colocalization.

Figure 3

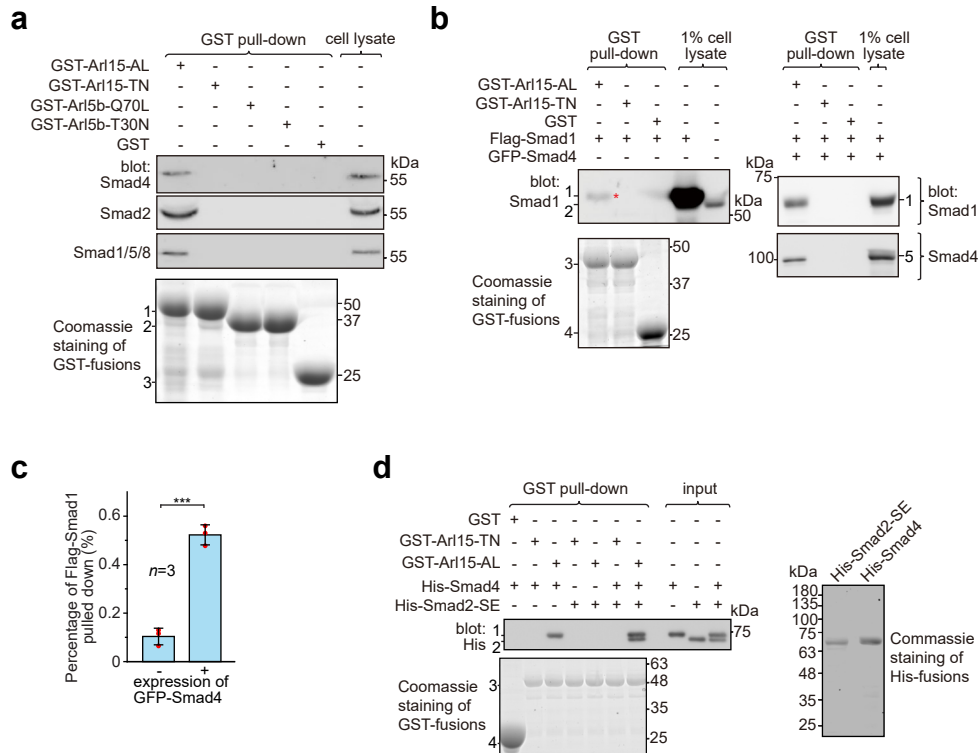

873 **Figure 3** Arl15-GTP indirectly interacts with R-Smads via Smad4. HEK293T cells under the normal  
874 culture condition were used. **a** The GTP-mutant form of Arl15 specifically pulled down endogenous R-  
875 Smads in addition to Smad4. Bead-immobilized GST-fusion proteins were incubated with the cell lysate,  
876 and pull-downs and the cell lysate were immunoblotted against indicated Smads. 1, 2, and 3 indicate GST-  
877 Arl15 (AL or TN), GST-Arl5b (Q70L or T30N), and GST band. Arl5b serves as a negative control. **b, c** The  
878 GTP-mutant form of Arl15 pulled down more exogenously expressed Smad1 when Smad4 was co-  
879 expressed. In **b**, bead-immobilized GST-fusion proteins were incubated with cell lysates expressing  
880 indicated proteins, and pull-downs and the cell lysates were immunoblotted against Smad1 and 4. 1, Flag-  
881 Smad1; 2, endogenous Smad1/5/8; 3, GST-Arl15 (AL or TN); 4, GST; 5, GFP-Smad4; \*, the weak band of  
882 Flag-Smad1 that was pulled down without co-expression of Smad4. Percentage of Flag-Smad1 pulled down,  
883 calculated as the ratio of the intensity of the pull-down band to that of the corresponding 1% cell lysate input  
884 band, is plotted in **c**. Error bar, mean  $\pm$  SD of  $n = 3$  experiments.  $p$  values are from the  $t$ -test (unpaired and  
885 two-tailed). \*\*\*,  $p \leq 0.0005$ . Red dot, individual data point. **d** Arl15-GTP, Smad4 and Smad2 can assemble  
886 into a complex. Bead-immobilized GST-fusion proteins were incubated with indicated purified His-tagged  
887 Smads, and pull-downs were immunoblotted against His-tag. 1, His-Smad4; 2, His-Smad2-SE; 3, GST-  
888 Arl15 (AL or TN); 4, GST. The loading of fusion proteins is shown by Coomassie staining in **a, b** and **d**.  
889 Molecular weights (in kDa) are labeled in all immunoblots and gels.

Figure 4

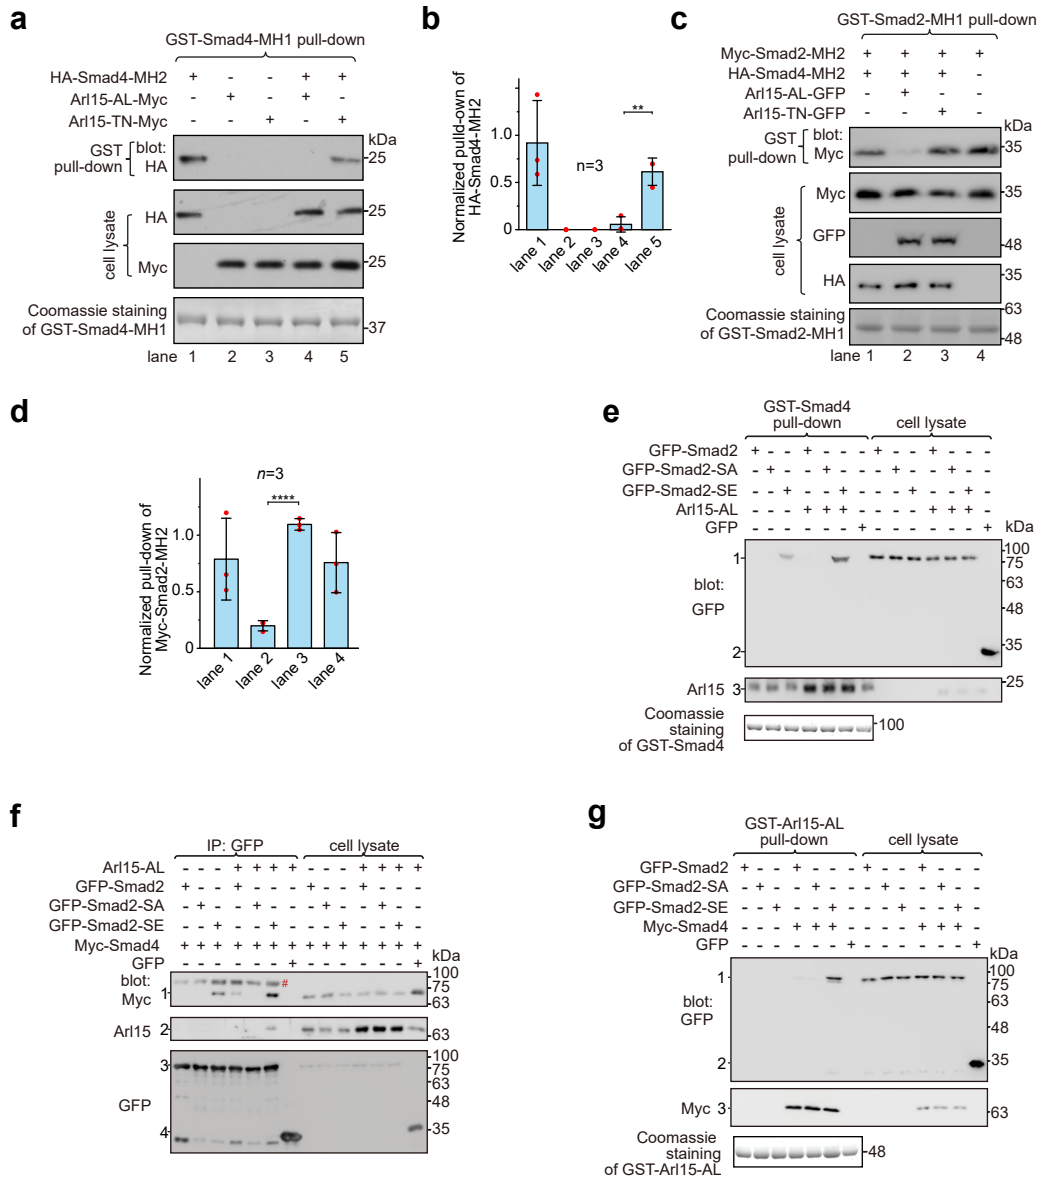

890 **Figure 4** Arl15-GTP opens Smad4 and promotes assembly of the Smad-complex. HEK293T cells  
891 under the normal culture condition were used. **a** The GTP-mutant form of Arl15 opens Smad4 by inhibiting  
892 the intramolecular interaction between the MH1 and MH2 domain of Smad4. Bead-immobilized GST-  
893 Smad4-MH1 was incubated with the cell lysates expressing indicated proteins, and pull-downs and the cell  
894 lysates were immunoblotted against HA or Myc-tag. **b** The normalized pull-down of HA-Smad4-MH2 for  
895 assays conducted in **a**. The ratio of the intensity of the pull-down to that of the corresponding cell lysate  
896 band was calculated and plotted. **c** Arl15-GTP increases the intermolecular interaction between the Smad4-  
897 MH2 and Smad2-MH2 domain. Bead-immobilized GST-Smad2-MH1 domain was incubated with the cell  
898 lysates expressing indicated proteins, and pull-downs and the cell lysates were immunoblotted against  
899 indicated tags. **d** The normalized pull-down of Myc-Smad2-MH2 for assays conducted in **c**. Quantification  
900 was the same as in **b**. In **b,d**, error bar, mean  $\pm$  SD of  $n = 3$  experiments.  $p$  values are from the  $t$ -test  
901 (unpaired and two-tailed). \*\*,  $p \leq 0.005$ ; \*\*\*\*,  $p \leq 0.00005$ . Red dot, individual data point. **e,f** Arl15-GTP  
902 promotes the interaction between Smad4 and phospho-Smad2. In **e**, bead-immobilized GST-Smad4 was  
903 incubated with the cell lysates expressing indicated proteins, and pull-downs and the cell lysates were  
904 immunoblotted against indicated tags or protein. 1, GFP-Smad2 (WT, SA or SE); 2, GFP; 3, endogenous  
905 Arl15 or overexpressed Arl15-AL. In **f**, the cell lysates expressing indicated proteins were incubated with  
906 anti-GFP antibody, and co-IPs and the cell lysates were immunoblotted against indicated tags or protein.  
907 1, Myc-Smad4; 2, endogenous Arl15 or overexpressed Arl15-AL; 3, GFP-Smad2 (WT, SA or SE); 4, GFP.  
908 #, non-specific band. **g** Arl15-GTP, Smad4, and phospho-Smad2 can assemble into a complex. Bead-  
909 immobilized GST-Arl15-AL was incubated with the cell lysates expressing indicated proteins, and pull-  
910 downs and the cell lysates were blotted. 1, GFP-Smad2 (WT, SA or SE); 2, GFP; 3, Myc-Smad4. In **a,c,e**,  
911 and **g**, loading of GST-fusion proteins is shown by Coomassie staining. Molecular weights (in kDa) are  
912 labeled in all immunoblots.

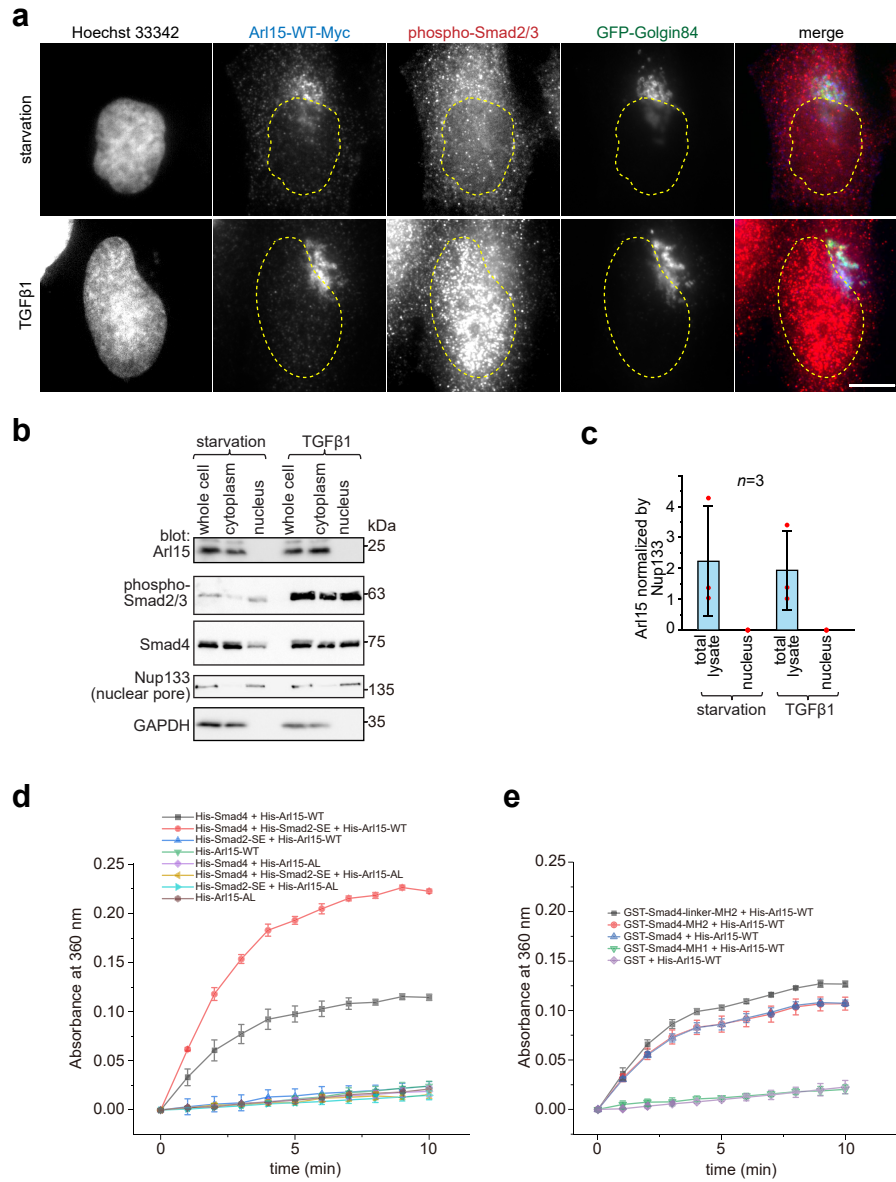



913 **Figure 5** The Smad-complex functions as a GAP to inactivate and dissociate Arl15 before  
914 translocating to the nucleus. **a-c** Under TGF $\beta$ 1 treatment, phospho-Smad2/3, but not Arl15, translocated to  
915 the nucleus. In **a**, serum-starved HeLa cells expressing GFP-Golgin84 (a Golgi marker) and Arl15-WT-Myc  
916 were either further serum-starved or treated with 10 ng ml<sup>-1</sup> TGF $\beta$ 1 for 1 h. Cells were stained for DNA  
917 (Hoechst 33342) and endogenous phospho-Smad2/3. Dotted line indicates contour of the nucleus. Scale  
918 bar, 10  $\mu$ m. In **b**, serum-starved HeLa cells were either further serum-starved or treated with 10 ng ml<sup>-1</sup>  
919 TGF $\beta$ 1 for 1 h. Total cell lysate and nuclear and cytosol fractions were subjected to immunoblotting against  
920 indicated proteins. GAPDH, glyceraldehyde 3-phosphate dehydrogenase. Molecular weights (in kDa) are  
921 labeled in immunoblots. In **c**, assays conducted in **b** were quantified to show the relative amount of Arl15  
922 normalized by Nup133. The ratio of the intensity of Arl15 band to that of the corresponding Nup133 band  
923 was calculated. Red dot, individual data point. **d** Phospho-Smad2 promotes the GAP activity of Smad4  
924 toward Arl15. 40  $\mu$ M GTP-loaded His-Arl15-WT or AL was incubated with 0.4  $\mu$ M indicated His-Smads at  
925 22 °C. Released inorganic phosphate was enzymatically converted and continuously monitored by  
926 absorbance at 360 nm. The absorbance was plotted against time. **e** The Smad4-MH2 domain possesses  
927 the GAP activity toward Arl15. The experiment was conducted as in **d**. GST-fused Smad4 fragments were  
928 used. In **c**, **d**, and **e**, error bar, mean  $\pm$  SD of  $n = 3$  experiments.



929 **Figure 6** Arl15-GTP is an essential and positive regulator for the TGF $\beta$  family signaling pathway. **a**  
930 Arl15 can positively regulate the TGF $\beta$  signaling pathway since overexpressed Arl15-WT and AL, but not  
931 TN, promotes the transcription of SBE $\times$ 4-luc reporter under starvation. HeLa cells co-expressing the  
932 SBE $\times$ 4-driven firefly luciferase and SV40-driven renilla luciferase together with indicated Arl15 mutant or  
933 pBluescript SK vector DNA (control) were serum-starved for 24 h. For TGF $\beta$ 1 induction, control cells were  
934 serum-starved for 4 h followed by 5 ng ml<sup>-1</sup> TGF $\beta$ 1 treatment for 20 h. Dual-luciferase assays were  
935 performed, and relative luciferase activities were subsequently acquired and normalized. **b** Arl15 is  
936 essential for efficient TGF $\beta$ 1 signaling since its depletion reduces TGF $\beta$ 1-stimulated transcription of  
937 SBE $\times$ 4-luc reporter. After lentivirus-mediated knockdown of Arl15, HeLa cells co-expressing the dual-  
938 luciferase described in **a** were serum-starved for 4 h followed by either further starvation or 5 ng ml<sup>-1</sup> TGF $\beta$ 1  
939 (starvation + TGF $\beta$ 1) treatment for 20 h. Relative luciferase activities were subsequently acquired and  
940 normalized. GL2 is a non-targeting control shRNA. **c** Overexpression of Arl15-AL, but not TN, promotes the  
941 transcription of N-cadherin, ID1, Snail1, p27<sup>kip1</sup>, and p21<sup>cip1</sup>, and suppresses the transcription of E-cadherin  
942 and c-Myc. MCF7 cells were subjected to lentivirus-transduced overexpression of Arl15-AL or TN followed  
943 by starvation for 16 h. Transcripts of indicated genes were quantified by RT-qPCR and normalized by  
944 control (empty vector). **d** Opposite to overexpression, depletion of Arl15 suppresses TGF $\beta$ 1-induced  
945 transcription of N-cadherin, ID1, Snail1, p27<sup>kip1</sup>, and p21<sup>cip1</sup>, and promotes the transcription of E-cadherin  
946 and c-Myc. After lentivirus-transduced knockdown of Arl15, MCF7 cells were subjected to 5 ng ml<sup>-1</sup> TGF $\beta$ 1  
947 treatment for 72 h. Transcripts of indicated genes were quantified and normalized as in **c**. Error bar, mean  
948  $\pm$  SD of  $n = 3$  experiments.  $p$  values were from the  $t$ -test (unpaired and two-tailed). NS, not significant ( $p >$   
949 0.05); \*,  $p \leq 0.05$ ; \*\*,  $p \leq 0.005$ ; \*\*\*,  $p \leq 0.0005$ ; \*\*\*\*,  $p \leq 0.00005$ ; \*\*\*\*\*,  $p \leq 0.000005$ .

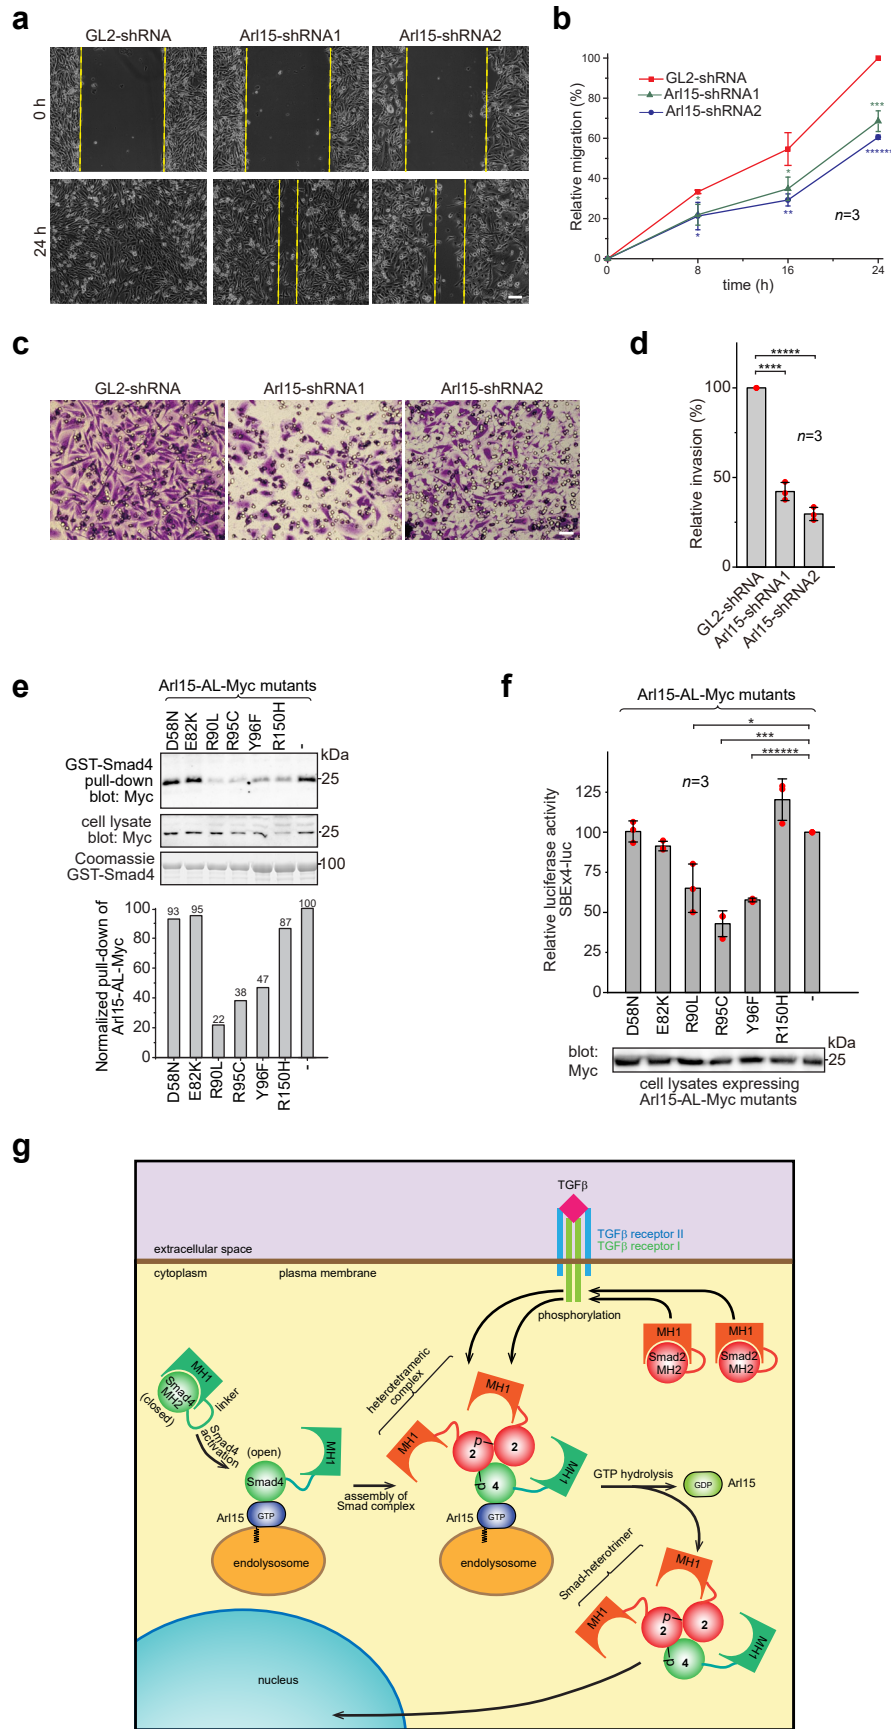

950 **Figure 7** Implication of Arl15 in tumorigenesis by *in vitro* assays and mutation analysis, and our  
951 working model on how Arl15 regulates the TGF $\beta$  family signaling pathway. **a, b** Arl15 is required for *in vitro*  
952 migration of MDA-MB-231 cells. MDA-MB-231 cells were subjected to lentivirus-transduced knockdown  
953 using indicated shRNA. When cells reached confluency, a strip of cells was scraped off, and the resulting  
954 gap was live-imaged to monitor the migration of cells. The percentage of the relative migration (see Methods)  
955 is plotted in **b**. **c, d** Arl15 is required for *in vitro* invasion and migration of MDA-MB-231 cells. MDA-MB-231  
956 cells were subjected to lentivirus-transduced knockdown using indicated shRNA and were subsequently  
957 placed into cell culture filter chambers with basement matrix. Cells that invaded through the matrix and  
958 migrated to the lower surface of the filter were stained in **c**. In **d**, the relative invasion was calculated as  
959 described in Materials and Methods. Scale bar, 100  $\mu$ m. **e, f** Arl15 missense mutations identified from cancer  
960 patients compromise Arl15-Smad4 interaction and TGF $\beta$  signaling. In **e**, bead-immobilized GST-Smad4  
961 was incubated with HeLa cell lysates expressing Arl15-AL-Myc harboring indicated mutation, and pull-  
962 downs and the cell lysates were immunoblotted against Myc-tag. Normalized pull-down of Arl15-AL-Myc  
963 was shown below, and it was calculated as the ratio of the intensity of the pull-down band to that of the  
964 corresponding cell lysate band. Loading of fusion proteins is shown by Coomassie staining. In **f**, HeLa cells  
965 were co-transfected to express the dual-luciferase and Arl15-AL-Myc with indicated mutation. After 20 h  
966 starvation, cells were subjected to the dual-luciferase assay and Western blot analysis for Myc-tag. In **b, d,**  
967 and **f**, error bar, mean  $\pm$  SD of  $n = 3$  experiments.  $p$  values were from the  $t$ -test (unpaired and two-tailed).  
968 \*,  $p \leq 0.05$ ; \*\*\*,  $p \leq 0.0005$ ; \*\*\*\*\*,  $p \leq 0.0000005$ . Red dot, individual data point. Molecular weights (in  
969 kDa) are labeled in all immunoblots. **g** A working model illustrating the molecular mechanism on how Arl15  
970 regulates the TGF $\beta$  family signaling pathway. Smad2 is used as an example of the R-Smad. 2, Smad2; 4,  
971 Smad4; p, phosphate group at Smad2. See text for details.

Supplementary Figure 1

**a**

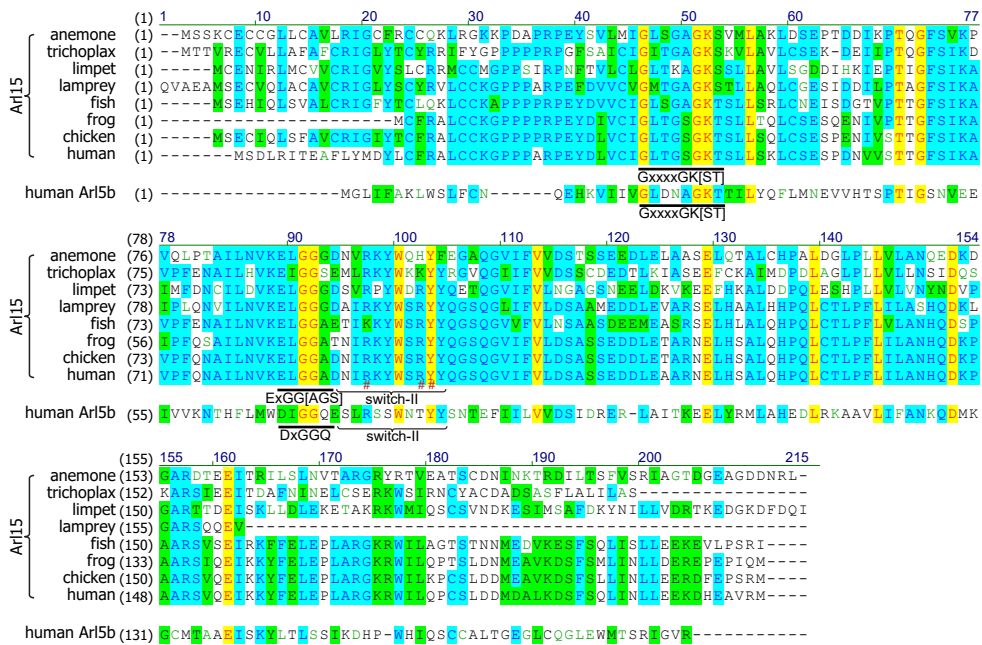

**b**

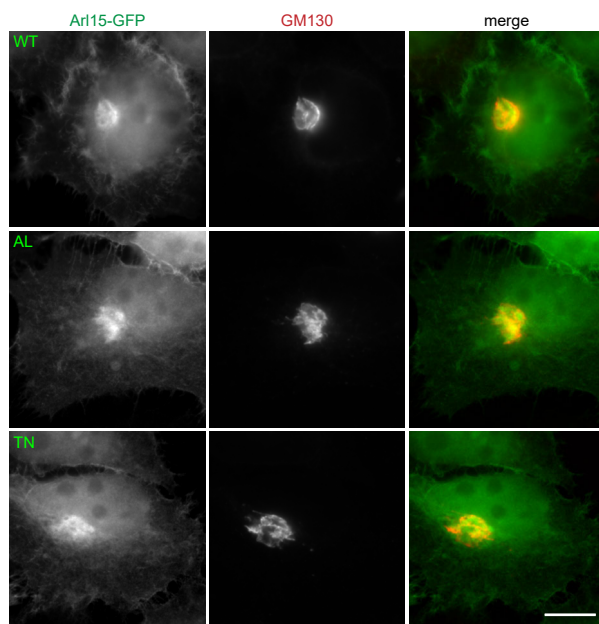

**c**

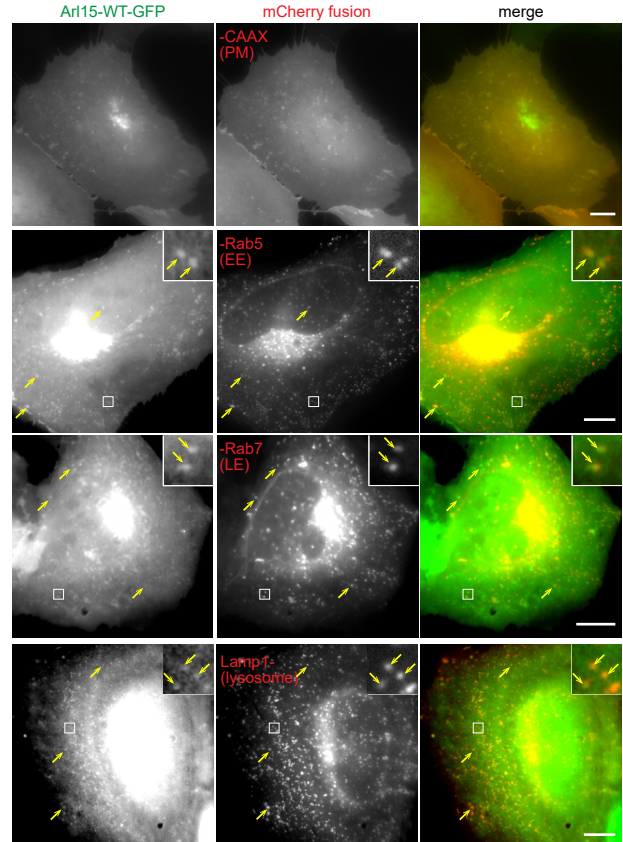

972 **Supplementary Information**

973 **Supplementary figure legends**

974 **Supplementary Figure 1** Multiple sequence alignment of Arl15 and Arl5b and sub-cellular  
975 localization of Arl15. **a** Multiple sequence alignment of metazoan Arl15 orthologues and human Arl5b. The  
976 conserved G1 (GxxxxGK[ST]) and G3 (ExGG[AGS]) motifs (DxGGQ for Arl5b) are underlined, and the  
977 switch-II region is marked. In human Arl15 sequence, R90, R95, and Y96 are indicated by #. The following  
978 UniProt sequences of Arl15 were used: anemone, A7SYP3; trichoplax, B3RRR0; limpet, V4BVB7; lamprey,  
979 S4R642; fish, A5PMK4; chicken, F1NMW9; frog, F6WKV0; human, Q9NXU5. The Uniprot ID of human  
980 Arl5b is Q96KC2. **b** Arl15-WT, AL, and TN mutants localize to the Golgi. HeLa cells transiently expressing  
981 Arl15-(WT, AL, or TN)-GFP were immunostained for endogenous GM130. **c** C-terminally GFP-tagged Arl15  
982 can be detected at the PM (mCherry-CAAX), EE (mCherry-Rab5), LE (mCherry-Rab7), and lysosome  
983 (Lamp1-mCherry). HeLa cells transiently co-expressing Arl15-WT-GFP and indicated mCherry-tagged  
984 organelle marker were imaged live. Boxed regions are zoomed in in the upper right corners to show  
985 colocalization. Arrows indicate colocalization. All images were acquired by a wide-field microscope. Scale  
986 bar, 10  $\mu$ m.

Supplementary Figure 2

**a**

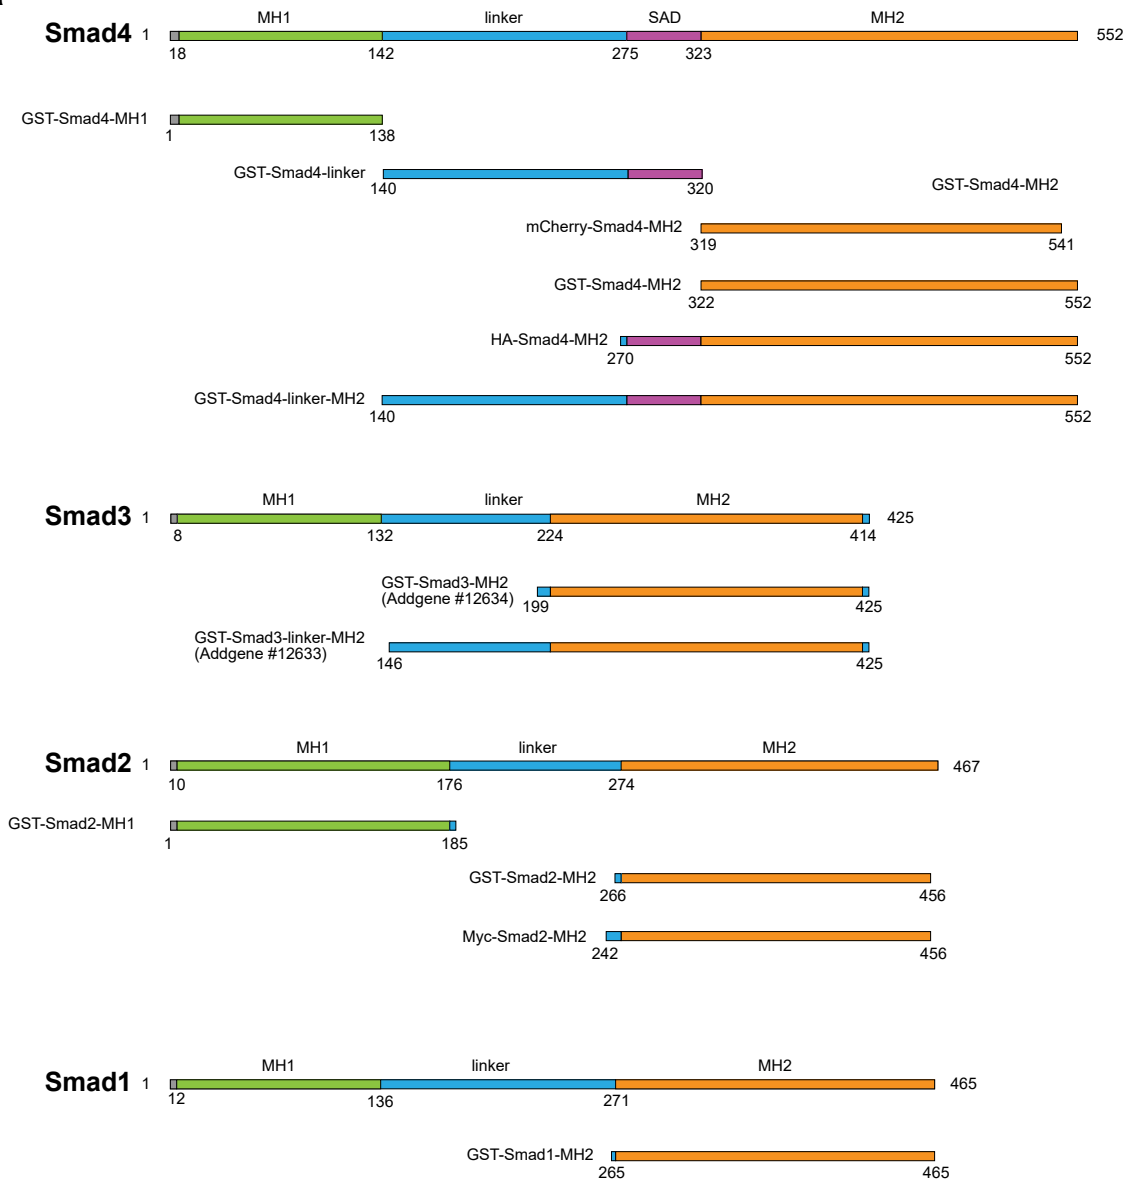

**b**

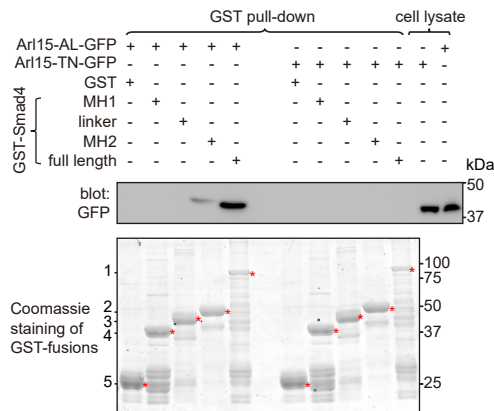

**c**

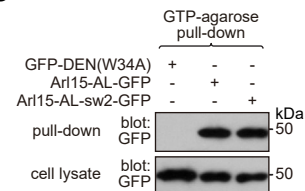



987 **Supplementary Figure 2** A schematic diagram showing the domain organization of Smad  
988 constructs, a pull-down assay investigating the interaction between Arl15 and Smad4 domains, and a GTP-  
989 binding assay demonstrating the proper folding of Arl15 switch-II mutant. **a** A schematic diagram showing  
990 the domain organization of Smad1, 2, 3, and 4 constructs. Numbers indicate corresponding amino acid  
991 positions in the full-length protein sequence. SAD, Smad4 activation domain. **b** The linker region of Smad4  
992 does not interact with the GTP-mutant form of Arl15. Bead-immobilized GST-fusions of Smad4 fragments  
993 were incubated with HEK293T cell lysate expressing Arl15-AL-GFP or Arl15-TN-GFP, and pull-downs were  
994 immunoblotted against GFP. Loading of GST-fusions was shown below by Coomassie staining. 1, GST-  
995 Smad4; 2, GST-Smad4-MH2; 3, GST-Smad4-linker; 4, GST-Smad4-MH1; 5, GST. \* indicates specific band.  
996 **c** Arl15 switch-II mutant, Arl15-AL-sw2-GFP, can bind to GTP. HEK293T cells lysates expressing indicated  
997 GFP-tagged proteins were incubated with the GTP-agarose, and pull-downs were immunoblotted against  
998 GFP. GFP-DEN(W34A), which is not a G protein, serves as a negative control. In **b** and **c**, molecular  
999 weights (in kDa) are labeled in all immunoblots.

Supplementary Figure 3

**a**

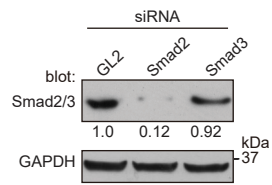

**b**

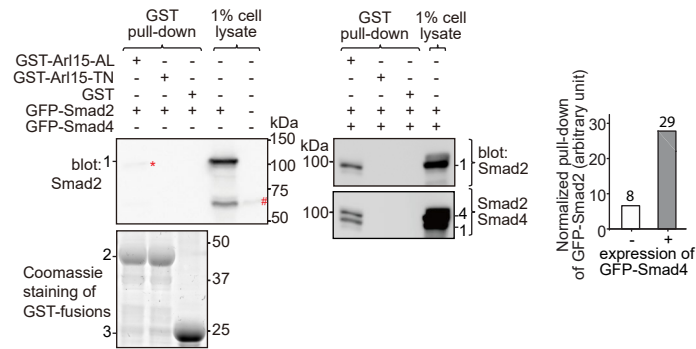

1000 **Supplementary Figure 3** Arl15-GTP indirectly interacts with Smad2 via Smad4. HEK293T cells  
1001 under the normal culture condition were used. **a** The anti-Smad2/3 mAb primarily detects endogenous  
1002 Smad2 in HEK293T cells. Cells were subjected to GL2, Smad2, or Smad3 siRNA knockdown, and the  
1003 resulting cell lysates were blotted for indicated proteins. Ratios of the intensity of Smad2/3 band to that of  
1004 GAPDH band are displayed below. **b** The GTP-mutant form of Arl15 pulls down more exogenously  
1005 expressed Smad2 when Smad4 was co-expressed. Bead-immobilized GST-fusion proteins were incubated  
1006 with cell lysates expressing indicated proteins, and pull-downs and 1% cell lysate inputs were  
1007 immunoblotted against Smad2 (anti-Smad2/3 mAb) and Smad4. In the middle panel, the same blot was  
1008 sequentially blotted for Smad2 (upper blot) followed by Smad4 (lower blot). 1, GFP-Smad2; 2, GST-Arl15  
1009 (AL or TN); 3, GST; 4, GFP-Smad4; #, endogenous Smad2; \*, the weak band of GFP-Smad2 that was  
1010 pulled down without co-expression of Smad4. The normalized pull-down of GFP-Smad2, calculated by the  
1011 ratio of the intensity of the pull-down band to that of 1% cell lysate input band, is plotted in the right panel.  
1012 Loading of fusion proteins is shown by Coomassie staining. Molecular weights (in kDa) are labeled in  
1013 immunoblots and gels.

## Supplementary Figure 4

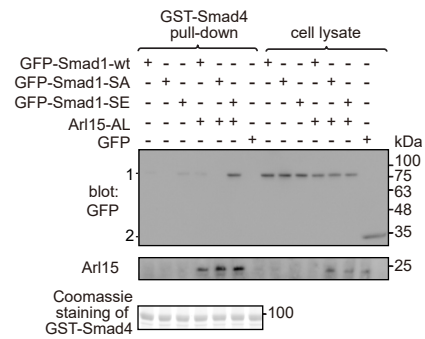

1014 **Supplementary Figure 4** Arl15-GTP promotes the interaction between Smad4 and phospho-Smad1.  
1015 HEK293T cells were cultured under normal condition. Bead-immobilized GST-Smad4 was incubated with  
1016 cell lysates expressing indicated proteins, and pull-downs and the cell lysates were immunoblotted for GFP  
1017 or Arl15. 1 and 2 indicate GFP-Smad1 (WT, SA, or SE) and GFP bands, respectively. Loading of fusion  
1018 proteins is shown by Coomassie staining. Molecular weights (in kDa) are labeled in the immunoblot.

Supplementary Figure 5

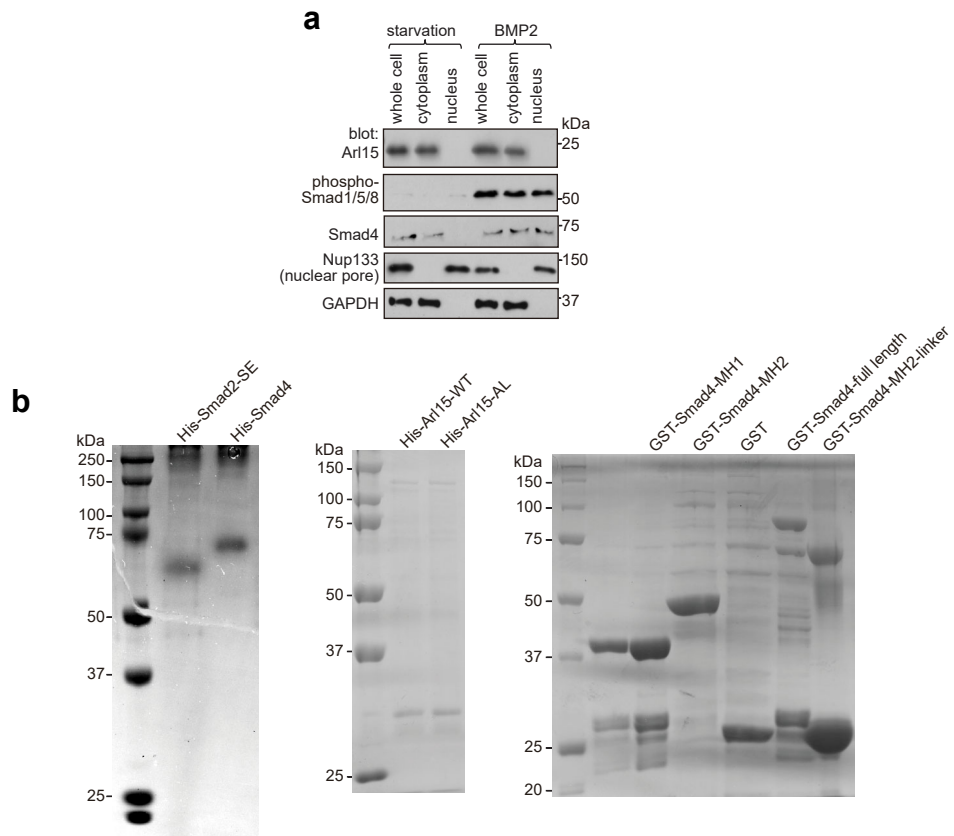

1019 **Supplementary Figure 5** Nucleus translocation of phospho-Smad1/5/8 and Coomassie gels of  
1020 purified proteins used in GAP assays. **a** Under BMP2 treatment, phospho-Smad1/5/8, but not Arl15,  
1021 translocates to the nucleus. As described in Figure 5b, serum-starved HeLa cells were either further serum-  
1022 starved or treated with 100 ng ml<sup>-1</sup> BMP2 for 4 h. Total cell lysate and nuclear and cytosol fractions were  
1023 subjected to immunoblotting against indicated proteins. **b** Coomassie gels of purified proteins used in the  
1024 GAP assay described in Figure 5d,e. Molecular weights (in kDa) are labeled in all immunoblots and gels.

Supplementary Figure 6

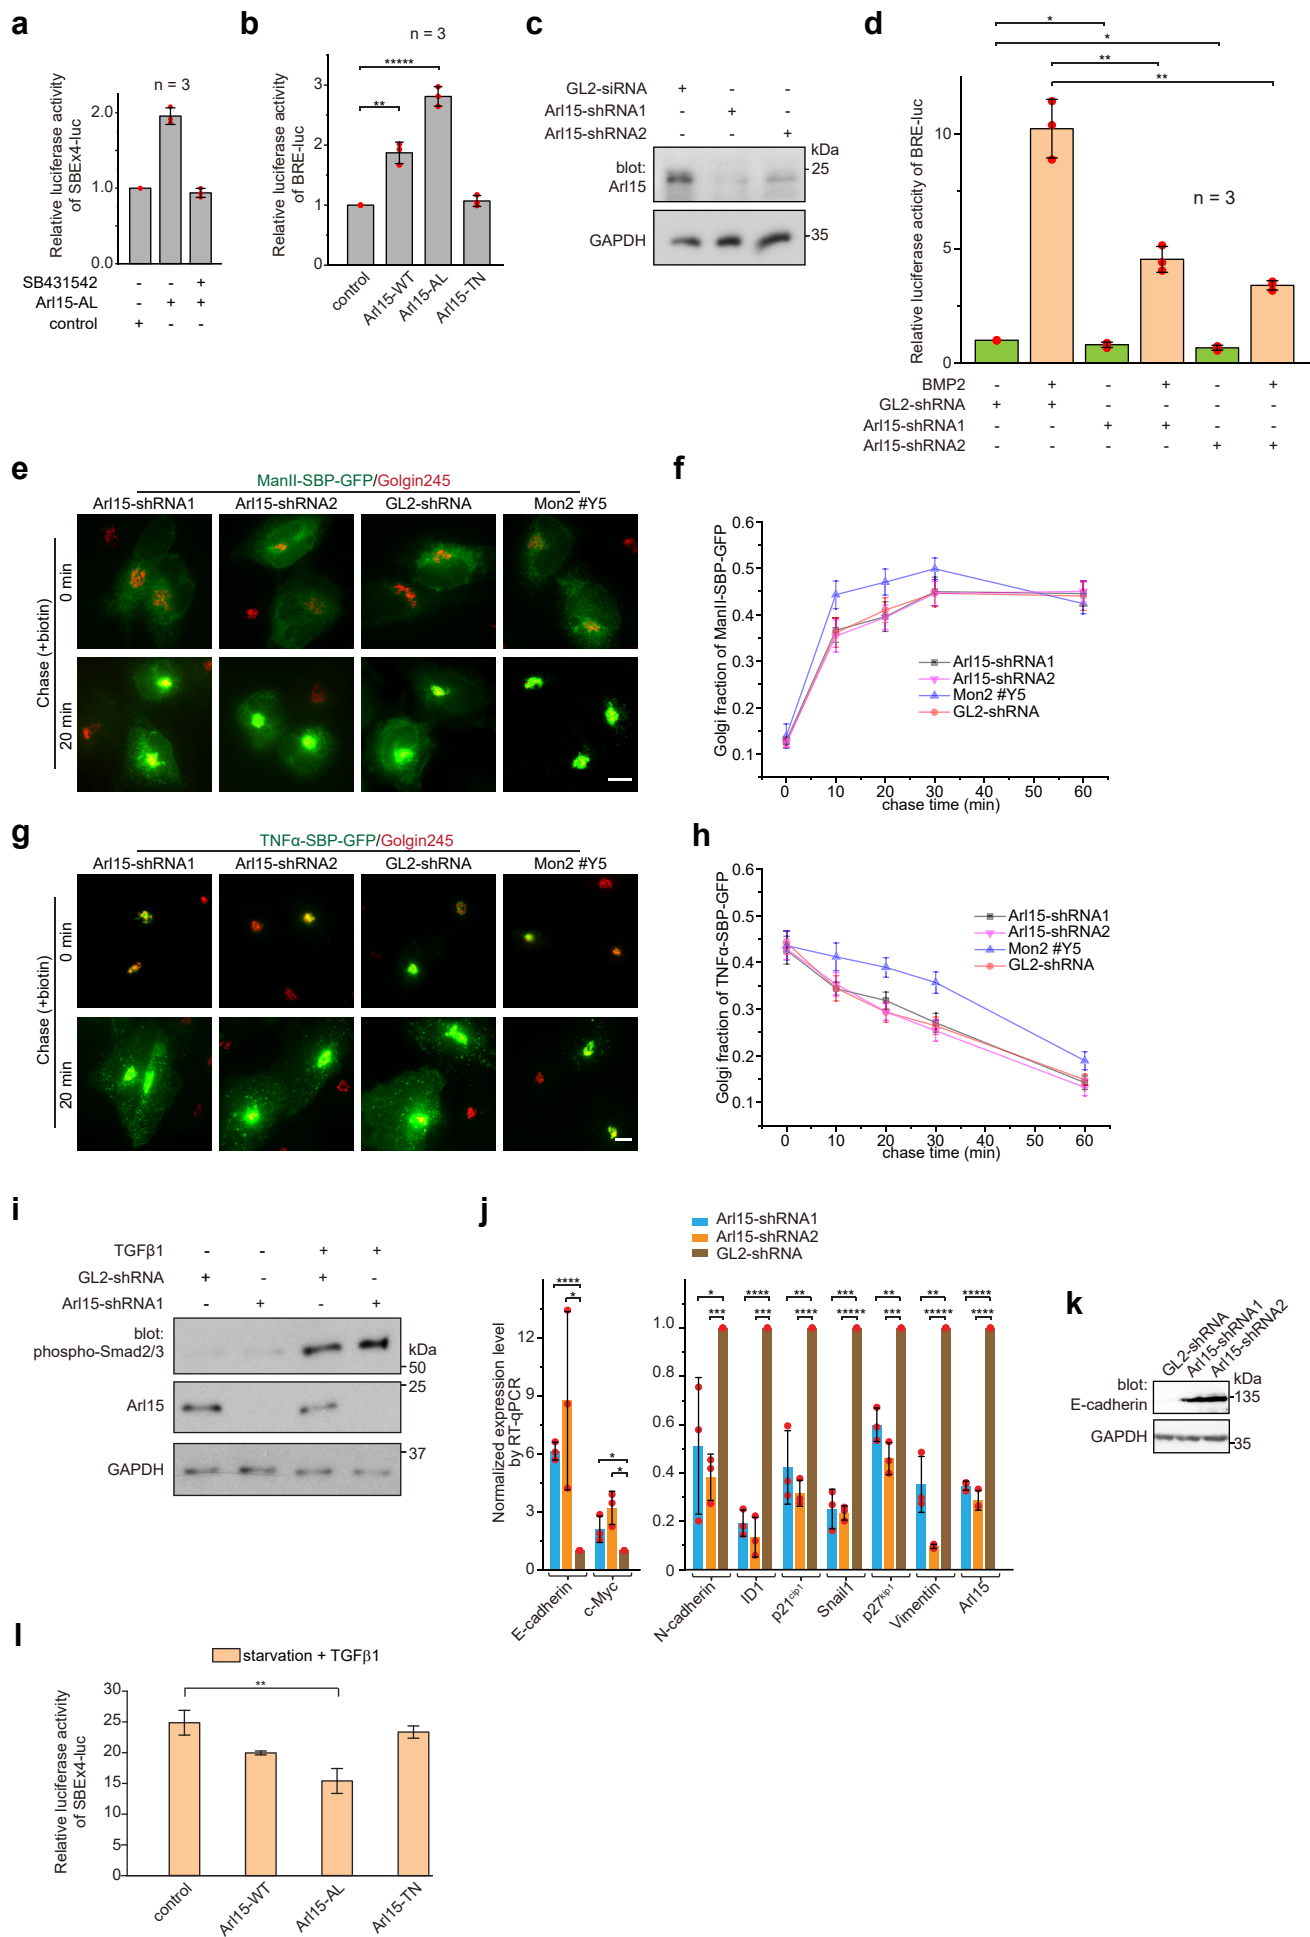



1025 **Supplementary Figure 6** Arl15 promotes the TGF $\beta$  family signaling pathway. **a** The Arl15-AL-  
1026 induced transcription of SBE $\times$ 4-luc requires the kinase activity of the TGF $\beta$  type I receptor. HeLa cells co-  
1027 expressing SBE $\times$ 4-driven firefly luciferase and SV40-driven renilla luciferase together with Arl15-AL or  
1028 pBluescript SK vector DNA (control) were serum-starved for 4 h followed by 20 h treatment with starvation  
1029 medium with or without 2  $\mu$ M SB431542. The relative luciferase activities were subsequently acquired and  
1030 normalized. **b** Arl15 positively regulates the BMP signaling pathway since overexpression of Arl15-WT or  
1031 AL, but not TN, promotes the transcription of BRE-luc reporter. HeLa cells co-expressing BRE-driven firefly  
1032 luciferase and SV40-driven renilla luciferase together with indicated Arl15 mutant, or pBluescript SK vector  
1033 DNA (control) were serum-starved for 24 h. The relative luciferase activities were subsequently acquired  
1034 and normalized. **c** Endogenous Arl15 can be depleted by lentivirus-transduced shRNA knockdown. HeLa  
1035 cells were lysed after lentivirus-transduced knockdown using indicated shRNA, and the resulting cell lysates  
1036 were immunoblotted for Arl15 and GAPDH. **d** Arl15 is essential for efficient BMP signaling since its depletion  
1037 reduces BMP2-stimulated transcription of BRE-luc reporter. After lentivirus-transduced knockdown of Arl15,  
1038 HeLa cells expressing the dual-luciferase as described in **b** were serum-starved for 4 h followed by 20 h  
1039 treatment with starvation medium supplemented with or without 100 ng ml<sup>-1</sup> BMP2. The relative luciferase  
1040 activities were subsequently acquired and normalized. **e, f** The ER-to-Golgi transport of ManII does not  
1041 require Arl15. In **e**, after lentivirus-transduced knockdown of Arl15, HeLa cells transiently expressing RUSH  
1042 reporter ManII-SBP-GFP were subjected to biotin treatment to chase ManII-SBP-GFP along the ER-to-  
1043 Golgi pathway (see Materials and methods). Golgi fractions were plotted in **f**. **g, h** The Golgi export of TNF $\alpha$   
1044 does not require Arl15. In **g**, after lentivirus-transduced knockdown of Arl15, HeLa cells transiently  
1045 expressing RUSH reporter TNF $\alpha$ -SBP-GFP was incubated at 20 °C in the presence of biotin to accumulate  
1046 TNF $\alpha$ -SBP-GFP at the Golgi. Cells were subsequently incubated at 37 °C to chase the reporter to exit the  
1047 Golgi. The Golgi fractions were plotted in **h**. Mon2 knockdown (Mon2 #Y5) serves as a control as it can  
1048 accelerate the ER-to-Golgi transport and delay the Golgi export of secretory cargos. Scale bar, 10  $\mu$ m. Error  
1049 bar, mean  $\pm$  SEM of  $n \geq 30$  cells. **i** Arl15 is not required for TGF $\beta$ 1-stimulated phosphorylation of Smad2/3.  
1050 After lentivirus-transduced knockdown of Arl15, HeLa cells were serum-starved for 4h followed by 20 h  
1051 treatment with starvation medium supplemented with or without 5 ng ml<sup>-1</sup> TGF $\beta$ 1. Cell lysates were  
1052 subsequently blotted for indicated proteins. **j** Depletion of Arl15 counteracts TGF $\beta$ 1-induced transcriptions

1053 – it downregulates the transcription of N-cadherin, ID1, Snail1, vimentin, p27<sup>kip1</sup>, and p21<sup>cip1</sup>, and  
1054 upregulates the transcription of E-cadherin and c-Myc. After lentivirus-transduced knockdown of Arl15,  
1055 MDA-MB-231 cells were subjected to 16 h starvation followed by 5 ng ml<sup>-1</sup> TGFβ1 treatment for 4 h.  
1056 Transcripts of indicated genes were quantified and normalized as in Figure 6d. **k** Depletion of Arl15  
1057 upregulates the expression of E-cadherin in MDA-MB-231 cells. Knockdown was conducted as in **d**. Cell  
1058 lysates were immunoblotted for E-cadherin and GAPDH. In **c**, **i**, and **k**, molecular weights (in kDa) are  
1059 labeled in immunoblots. **l** Arl15-AL inhibits TGFβ1-induced transcription of SBE×4-luc. The experiment was  
1060 conducted as described in Figure 6a except that all cells were treated with 5 ng ml<sup>-1</sup> TGFβ1. In **a**, **b**, **d**, **j**,  
1061 and **l**, error bar, mean ± SD of  $n = 3$  experiments.  $p$  values were from the  $t$ -test (unpaired and two-tailed).  
1062 NS, not significant ( $p > 0.05$ ); \*,  $p \leq 0.05$ ; \*\*,  $p \leq 0.005$ ; \*\*\*,  $p \leq 0.0005$ ; \*\*\*\*,  $p \leq 0.00005$ ; \*\*\*\*\*,  $p \leq$   
1063 0.000005. Red dot, individual data point.

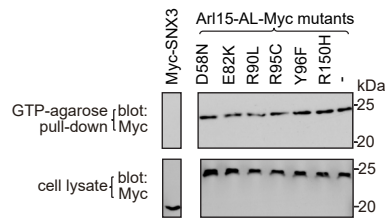

1064 **Supplementary Fig. 7** Arl15 missense mutations identified from cancer patients do not affect the  
1065 GTP-binding of Arl15-AL. The figure corresponds to Figure 7e,f. HEK293T cell lysates transiently  
1066 expressing indicated Myc-tagged proteins were incubated with the GTP-agarose, and pull-downs were  
1067 immunoblotted against Myc. Myc-SNX3, which is not a G protein, serves as a negative control. Molecular  
1068 weights (in kDa) are labeled. Bots in the same row are cropped from the same gel blot.

1069 **Supplementary Table 1**

1070 List of DNA plasmids used in this study.

Supplementary Table 1 DNA plasmids

vectors

| name           | vector (source)      | cloning sites | primers | brief method or source reference                   |
|----------------|----------------------|---------------|---------|----------------------------------------------------|
| pBluescript SK | Agilent Technologies |               |         |                                                    |
| pEGFP-C1x      |                      |               |         | It was described in Mahajan <i>et al.</i> , 2019.  |
| pMyc-C1x       |                      |               |         | It was described in Mahajan <i>et al.</i> , 2019.  |
| pET30ax        |                      |               |         | It was described in Mahajan <i>et al.</i> , 2019.  |
| pGEB           |                      |               |         | It was described in Mahajan <i>et al.</i> , 2013.  |
| pMyc-N1        |                      |               |         | It was described in Madugula <i>et al.</i> , 2016. |
| pLKO.1         |                      |               |         | Addgene # 10878; a gift from D. Root.              |
| pDMyc-neo      |                      |               |         | It was described in Mahajan <i>et al.</i> , 2013.  |
| pDHA-neo       |                      |               |         | It was described in Shi <i>et al.</i> , 2018.      |
| pMyc-C1        |                      |               |         | It was described in Shi <i>et al.</i> , 2018.      |

Constructs for Ar15

| name             | vector (source)     | cloning sites | primers                                                                                                                                                                                                                                          | brief method or source reference                                                                                                                                                                                                                                                                                                                                                                                                              |
|------------------|---------------------|---------------|--------------------------------------------------------------------------------------------------------------------------------------------------------------------------------------------------------------------------------------------------|-----------------------------------------------------------------------------------------------------------------------------------------------------------------------------------------------------------------------------------------------------------------------------------------------------------------------------------------------------------------------------------------------------------------------------------------------|
| Ar15-WT-GFP      | pEGFP-N1 (Clontech) | EcoRI/BamHI   | 5'-GTC TAG GAA TTC GCC ACC ATG TCT GAT CTC CGG ATA ACT GAG-3', 5'-CA CTA CGG ATC CCC CAT TCT TAC AGC TTC ATG GTC TTT TTC-3'                                                                                                                      | The coding sequence (CDS) of Ar15 was PCR-amplified using human IMAGE clone 4699068 as the template and the resulting PCR fragment was digested by EcoRI/BamHI and ligated into pEGFP-N1 vector using the same sites.                                                                                                                                                                                                                         |
| Ar15-AL-GFP      | pEGFP-N1 (Clontech) | EcoRI/BamHI   | 5'-GTC TAG GAA TTC GCC ACC ATG TCT GAT CTC CGG ATA ACT GAG-3', 5'-GTT ATC AAG CCC TCC AAG TTC-3', 5'-GAA CTT GGA GGG CTT GAT AAC-3', 5'-CA CTA CGG ATC CCC CAT TCT TAC AGC TTC ATG GTC TTT TTC-3'                                                | Two PCR amplifications were performed using human IMAGE clone 4699068 as the template and the first/second and third/fourth primer pair, respectively. The two PCR fragments were subsequently mixed and subjected to the second round of PCR amplification using the first/fourth primer pair. The resulting PCR product was digested by EcoRI/BamHI and ligated into pEGFP-N1 using the same sites. This construct contains A86L mutation.  |
| Ar15-TN-GFP      | pEGFP-N1 (Clontech) | EcoRI/BamHI   | 5'-GTC TAG GAA TTC GCC ACC ATG TCT GAT CTC CGG ATA ACT GAG-3', 5'-CAA CAG ACT GTT TTT GCC AG-3', 5'-CT GGC AAA AAC AGT CTG TTG-3', 5'-CA CTA CGG ATC CCC CAT TCT TAC AGC TTC ATG GTC TTT TTC-3'                                                  | Two PCR amplifications were performed using human IMAGE clone 4699068 as the template and the first/second and third/fourth primer pair, respectively. The two PCR fragments were subsequently mixed and subjected to the second round of PCR amplification using the first/fourth primer pair. The resulting PCR product was digested by EcoRI/BamHI and ligated into pEGFP-N1 using the same sites. This construct contains T46N mutation.  |
| Ar15-WT          | pCI-neo (Promega)   | EcoRI/NotI    | 5'-GTCACT GAATTC ATGTCTGATCTCCGAATAACT-3', 5'-GTCACT GCGGCCGC TCA CAT TCT TAC AGC TTC ATG-3'                                                                                                                                                     | The CDS of Ar15-wt was PCR-amplified using Ar15-wt-GFP as the template. The resulting PCR fragment was subsequently digested by EcoRI/NotI and ligated into pCI-neo vector using the same sites.                                                                                                                                                                                                                                              |
| Ar15-AL          | pCI-neo (Promega)   | EcoRI/NotI    | 5'-GTCACT GAATTC ATGTCTGATCTCCGAATAACT-3', 5'-GTCACT GCGGCCGC TCA CAT TCT TAC AGC TTC ATG-3'                                                                                                                                                     | The CDS of Ar15-AL was PCR-amplified using Ar15-AL-GFP as the template. The resulting PCR fragment was subsequently digested by EcoRI/NotI and ligated into pCI-neo vector using the same sites.                                                                                                                                                                                                                                              |
| Ar15-TN          | pCI-neo (Promega)   | EcoRI/NotI    | 5'-GTCACT GAATTC ATGTCTGATCTCCGAATAACT-3', 5'-GTCACT GCGGCCGC TCA CAT TCT TAC AGC TTC ATG-3'                                                                                                                                                     | The CDS of Ar15-TN was PCR-amplified using Ar15-TN-GFP as the template. The resulting PCR fragment was subsequently digested by EcoRI/NotI and ligated into pCI-neo vector using the same sites.                                                                                                                                                                                                                                              |
| GST-Ar15-AL      | pGEB                | EcoRI/BamHI   |                                                                                                                                                                                                                                                  | The CDS of Ar15-AL was released by digesting Ar15-AL-GFP using EcoRI/BamHI. The resulting fragment was subsequently ligated into pGEB vector using the same sites.                                                                                                                                                                                                                                                                            |
| GST-Ar15-TN      | pGEB                | EcoRI/BamHI   |                                                                                                                                                                                                                                                  | The CDS of Ar15-TN was released by digesting Ar15-TN-GFP using EcoRI/BamHI. The resulting fragment was ligated into pGEB vector using the same sites.                                                                                                                                                                                                                                                                                         |
| His-Ar15-WT      | pET30ax             | EcoRI/BamHI   |                                                                                                                                                                                                                                                  | The CDS of Ar15-wt was released by digesting GST-Ar15-wt using EcoRI/BamHI. The resulting fragment was subsequently ligated into pET30ax vector using the same sites.                                                                                                                                                                                                                                                                         |
| His-Ar15-AL      | pET30ax             | EcoRI/BamHI   |                                                                                                                                                                                                                                                  | The CDS of Ar15-AL was released by digesting GST-Ar15-AL using EcoRI/BamHI. The resulting fragment was subsequently ligated into pET30ax vector using the same sites.                                                                                                                                                                                                                                                                         |
| His-Ar15-TN      | pET30ax             | EcoRI/BamHI   |                                                                                                                                                                                                                                                  | The CDS of Ar15-TN was released by digesting GST-Ar15-TN using EcoRI/BamHI. The resulting fragment was subsequently ligated into pET30ax vector using the same sites.                                                                                                                                                                                                                                                                         |
| Ar15-AL-Myc      | pMyc-N1             | EcoRI/BamHI   |                                                                                                                                                                                                                                                  | The CDS of Ar15-AL was released by digesting Ar15-AL-GFP using EcoRI/BamHI. The resulting fragment was subsequently ligated into pMyc-N1 vector using the same sites.                                                                                                                                                                                                                                                                         |
| Ar15-TN-Myc      | pMyc-N1             | EcoRI/BamHI   |                                                                                                                                                                                                                                                  | The CDS of Ar15-TN was released by digesting Ar15-TN-GFP using EcoRI/BamHI. The resulting fragment was subsequently ligated into pMyc-N1 vector using the same sites.                                                                                                                                                                                                                                                                         |
| Ar15-AL-sw2-GFP  | pEGFP-N1 (Clontech) | EcoRI/BamHI   | 5'-GTC ACT GAA TTC A ATG TCT GAT CTC CGA ATA ACT G-3', 5'-TGT GTT CCA GGA TGA CCG GAT AGA ATC AAG CCC TCC AAG TTC TTT-3', 5'-TCT ATC CCG TCA TCC TGG AAC ACA TAC TAC CAA GGA TCT CAA GGG-3', 5'-GTC ACT GGA TCC TCA CAT TCT TAC AGC TTC ATG G-3' | Two PCR amplifications were performed using Ar15-AL-Myc as the template and the first/second and third/fourth primer pair, respectively. The two PCR fragments were subsequently mixed and subjected to the second round of PCR amplification using the first/fourth primer pair. The resulting PCR product was digested by EcoRI/BamHI and ligated into pEGFP-N1 vector using the same sites.                                                |
| Ar15-shRNA1      | pLKO.1              | EcoRI/Agel    | 5'-CCG GAA GCT GCT AGA AAT GAG CTG CCT CGA GGC AGC TCA TTT CTA GCA GCT TTT TTT G-3', 5'-AAT TCA AAA AAA GCT GCT AGA AAT GAG CTG CCT CGA GGC AGC TCA TTT CTA GCA GCT T-3'                                                                         | Two oligonucleotides were annealed and ligated into EcoRI/Agel digested pLKO.1 vector.                                                                                                                                                                                                                                                                                                                                                        |
| Ar15-shRNA2      | pLKO.1              | EcoRI/Agel    | 5'-CCG GAA GAC AGC TTC TCT CAG CTG ACT CGA GTC AGC TGA GAG AAG CTG TCT TTT TTT G-3', 5'-AAT TCA AAA AAA GAC AGC TTC TCT CAG CTG ACT CGA GTC AGC TGA GAG AAG CTG TCT T-3'                                                                         | Two oligonucleotides were annealed and ligated into EcoRI/Agel digested pLKO.1 vector.                                                                                                                                                                                                                                                                                                                                                        |
| Ar15-AL-D58N-Myc | pMyc-N1             | EcoRI/XmaI    | 5'-GAC AGC GAA TTC GCC ACC ATG TCT GAT CTC CGG ATA AC-3', 5'-C TGT GGT CGA CAC GAC GTT ATT GGG GCT TTC ACT GCA GAG-3', 5'-CTC TGC AGT GAA AGC CCC AAT AAC GTC GTG TCG ACC ACAG-3', 5'-GAC AGC CCC GGG TTA CAG ATC CTC TTC TGA GAT G-3'           | Two PCR amplifications were performed using Ar15-AL-Myc as the template and the first/second and third/fourth primer pair, respectively. The two PCR fragments were subsequently mixed and subjected to the second round of PCR amplification using the first/fourth primer pair. The resulting PCR product was digested by EcoRI/XmaI and ligated into pMyc-N1 vector using the same sites. This construct contains A86L and D58N mutations. |
| Ar15-AL-E82K-Myc | pMyc-N1             | EcoRI/XmaI    | 5'-GAC AGC GAA TTC GCC ACC ATG TCT GAT CTC CGG ATA AC-3', 5'-GTT ATC AAG CCC TCC AAG CTT TTT TAC ATT CAA GAT GGC-3', 5'-GCC ATC TTG AAT GTA AAA AAG CTT GGA GGG CTT GAT AAC-3', 5'-GAC AGC CCC GGG TTA CAG ATC CTC TTC TGA GAT G-3'              | Two PCR amplifications were performed using Ar15-AL-Myc as the template and the first/second and third/fourth primer pair, respectively. The two PCR fragments were subsequently mixed and subjected to the second round of PCR amplification using the first/fourth primer pair. The resulting PCR product was digested by EcoRI/XmaI and ligated into pMyc-N1 vector using the same sites. This construct contains A86L and E82K mutations. |
| Ar15-AL-R90L-Myc | pMyc-N1             | EcoRI/XmaI    | 5'-GAC AGC GAA TTC GCC ACC ATG TCT GAT CTC CGG ATA AC-3', 5'-GTA GCG GCT CCA GTA TTT GAG GAT GTT ATC AAG CCC TCC-3', 5'-GGA GGG CTT GAT AAC ATC CTC AAA TAC TGG AGC CGC TAC-3', 5'-GAC AGC CCC GGG TTA CAG ATC CTC TTC TGA GAT G-3'              | Two PCR amplifications were performed using Ar15-AL-Myc as the template and the first/second and third/fourth primer pair, respectively. The two PCR fragments were subsequently mixed and subjected to the second round of PCR amplification using the first/fourth primer pair. The resulting PCR product was digested by EcoRI/XmaI and ligated into pMyc-N1 vector using the same sites. This construct contains A86L and R90L mutations. |
| Ar15-AL-R95C-Myc | pMyc-N1             | EcoRI/XmaI    | 5'-GAC AGC GAA TTC GCC ACC ATG TCT GAT CTC CGG ATA AC-3', 5'-C TTG AGA TCC TTG GTA GTA ACA GCT CCA GTA TTT CCG GAT-3', 5'-ATC CCG AAA TAC TGG AGC TGT TAC TAC CAA GGA TCT CAA G-3', 5'-GAC AGC CCC GGG TTA CAG ATC CTC TTC TGA GAT G-3'          | Two PCR amplifications were performed using Ar15-AL-Myc as the template and the first/second and third/fourth primer pair, respectively. The two PCR fragments were subsequently mixed and subjected to the second round of PCR amplification using the first/fourth primer pair. The resulting PCR product was digested by EcoRI/XmaI and ligated into pMyc-N1 vector using the same sites. This construct contains A86L and R95C mutations. |
| Ar15-AL-Y96F-Myc | pMyc-N1             | EcoRI/XmaI    | 5'-GAC AGC GAA TTC GCC ACC ATG TCT GAT CTC CGG ATA AC-3', 5'-CCC TTG AGA TCC TTG GTA AAA GCG GCT CCA GTA TTT CCG-3', 5'-CGG AAA TAC TGG AGC CGC TTT TAC CAA GGA TCT CAA GGG-3', 5'-GAC AGC CCC GGG TTA CAG ATC CTC TTC TGA GAT G-3'              | Two PCR amplifications were performed using Ar15-AL-Myc as the template and the first/second and third/fourth primer pair, respectively. The two PCR fragments were subsequently mixed and subjected to the second round of PCR amplification using the first/fourth primer pair. The resulting PCR product was digested by EcoRI/XmaI and ligated into pMyc-N1 vector using the same sites. This construct contains A86L and Y96F mutations. |

|                    |         |            |                                                                                                                                                                                                                                     |                                                                                                                                                                                                                                                                                                                                                                                                                                                 |
|--------------------|---------|------------|-------------------------------------------------------------------------------------------------------------------------------------------------------------------------------------------------------------------------------------|-------------------------------------------------------------------------------------------------------------------------------------------------------------------------------------------------------------------------------------------------------------------------------------------------------------------------------------------------------------------------------------------------------------------------------------------------|
| Arl15-AL-R150H-Myc | pMyc-N1 | EcoRI/XmaI | 5'-GAC AGC GAA TTC GCC ACC ATG TCT GAT CTC CGG ATA AC-3', 5'-TTT GAT CTC TTG TAC TGA ATG AGC TGC TGG CTT GTC TTG-3', 5'-CAA GAC AAG CCA GCA GCT CAT TCA GTA CAA GAG ATC AAA-3', 5'-GAC AGC CCC GGG TTA CAG ATC CTC TTC TGA GAT G-3' | Two PCR amplifications were performed using Arl15-AL-Myc as the template and the first/second and third/fourth primer pair, respectively. The two PCR fragments were subsequently mixed and subjected to the second round of PCR amplification using the first/fourth primer pair. The resulting PCR product was digested by EcoRI/XmaI and ligated into pMyc-N1 vector using the same sites. This construct contains A86L and R150H mutations. |
|--------------------|---------|------------|-------------------------------------------------------------------------------------------------------------------------------------------------------------------------------------------------------------------------------------|-------------------------------------------------------------------------------------------------------------------------------------------------------------------------------------------------------------------------------------------------------------------------------------------------------------------------------------------------------------------------------------------------------------------------------------------------|

Constructs for Smads

| name                 | vector                  | cloning sites | primers                                                                                                            | brief method or source reference                                                                                                                                                                                                                                                                |
|----------------------|-------------------------|---------------|--------------------------------------------------------------------------------------------------------------------|-------------------------------------------------------------------------------------------------------------------------------------------------------------------------------------------------------------------------------------------------------------------------------------------------|
| GFP-Smad4            | pEGFP-C1 (Clontech)     | EcoRI/BamHI   | 5'-AGC TCT GAA TTC TAT GGA CAA TAT GTC TAT TAC G-3' and 5'-AGC TCT GGA TCC TCA GTC TAA AGG TTG TGG G-3'            | The CDS of human Smad4 was PCR-amplified using IMAGE clone 2961238 (GenBank Accession No.: BC002379.2) as the template. The resulting PCR product was subsequently digested by EcoRI/BamHI and ligated into pEGFP-C1 vector using the same sites.                                               |
| GST-Smad4            | pGEB                    | EcoRI/BamHI   | 5'-GTC ACT GAA TTC ATG GAC AAT ATG TCT ATT ACG-3', 5'-GTC ACT GGA TCC TCA GTC TAA AGG TTG TGG G-3'                 | The CDS of Smad4 was PCR-amplified using IMAGE clone 2961238 (GenBank Accession No.: BC002379.2) as the template. The resulting PCR product was subsequently digested by EcoRI/BamHI and ligated into pGEB vector using the same sites.                                                         |
| GST-Smad4-MH1        | pGEB                    | EcoRI/BamHI   | 5'-GTC ACT GAA TTC ATG GAC AAT ATG TCT ATT ACG-3', 5'-GTC ACT GGA TCC TTA GTG ATA CAA CTC GTT CGT AG-3'            | The CDS of MH1 domain (1-138aa) of Smad4 was PCR-amplified using IMAGE clone 2961238 (GenBank Accession No.: BC002379.2) as the template. The resulting PCR product was subsequently digested by EcoRI/BamHI and ligated into pGEB vector using the same sites.                                 |
| GST-Smad4-Linker     | pGEB                    | EcoRI/BamHI   | 5'-GTC ACT GAA TTC CTG GAA TTG ATC TCT CAG G-3', 5'-GTC ACT GGA TCC TTA CAG GAG CAG GAT GAT TGG-3'                 | The CDS of the linker region (140-320aa) of Smad4 was PCR-amplified using IMAGE clone 2961238 (GenBank Accession No.: BC002379.2) as the template. The resulting PCR product was subsequently digested by EcoRI/BamHI and ligated into pGEB vector using the same sites.                        |
| GST-Smad4-MH2        | pGEB                    | EcoRI/BamHI   | 5'-GTC ACT GAA TTC AGT ATT GGT GTT CCA TTG C-3', 5'-GTC ACT GGA TCC TCA GTC TAA AGG TTG TGG G-3'                   | The CDS of MH2 domain (322-552aa) of Smad4 was PCR-amplified using IMAGE clone 2961238 (GenBank Accession No.: BC002379.2) as the template. The resulting PCR product was subsequently digested by EcoRI/BamHI and ligated into pGEB vector using the same sites.                               |
| GST-Smad4-linker-MH2 | pGEB                    | EcoRI/BamHI   | 5'-GTC ACT GAA TTC CTG GAA TTG ATC TCT CAG G-3', 5'-GTC ACT GGA TCC TCA GTC TAA AGG TTG TGG G-3'                   | The CDS comprising the linker region and MH2 domain of Smad4 (140-552aa) was PCR-amplified using IMAGE clone 2961238 (GenBank Accession No.: BC002379.2) as the template. The resulting PCR product was subsequently digested by EcoRI/BamHI and ligated into pGEB vector using the same sites. |
| HA-Smad4-MH2         | pDHA-neo                | EcoRI/SalI    | 5'-GTC ACT GAA TTC AAG TAG GAC TGC ACC ATA CAC-3', 5'-GTC ACT GTC GAC TCA GTC TAA AGG TTG TGG G-3'                 | The CDS of MH2 domain (270-552aa including SAD and MH2 domain) of Smad4 was PCR-amplified using IMAGE clone 2961238 (GenBank Accession No.: BC002379.2) as the template. The resulting PCR product was subsequently digested by EcoRI/SalI and ligated into pDHA-neo.                           |
| Myc-Smad4            | pMyc-C1                 | BamHI/SacI    |                                                                                                                    | The CDS of Smad4 was released by digesting GFP-Smad4 using BamHI/SacI. The resulting fragment was subsequently ligated into pMyc-C1 vector using the same sites.                                                                                                                                |
| mCherry-Smad4        | pmCherry-C1 (Clontech)  | EcoRI/BamHI   | 5'-GAT GCA GAA TTC TGA CAA TAT GTC TAT TAC G-3', 5'-GAT GCA GGA TCC TCA GTC TAA AGG TTG TGG-3'                     | The CDS of the full length Smad4 was PCR-amplified using Myc-Smad4 as the template. The resulting PCR product was digested by EcoRI/BamHI and ligated into pmCherry-C1 vector using the same sites.                                                                                             |
| mCherry-Smad4-MH2    | pmCherry-C1 (Clontech)  | EcoRI/BamHI   | 5'-GAT GCA GAA TTC TCC TGA GTA TTG GTG TTC C-3', 5'-GAT GCA GGA TCC TCA ATG AAG TAC TTC GTC TAG-3'                 | The CDS of the MH2 domain (319-541aa) of Smad4 was PCR-amplified using Myc-Smad4 as the template. The resulting PCR product was digested by EcoRI/BamHI and ligated into pmCherry-C1 vector using the same sites. Note that the C-terminal 11 amino acids are truncated in this clone.          |
| His-Smad4            | pET-30ax                | EcoRI/BamHI   |                                                                                                                    | The CDS of Smad4 was released by digesting pGEB-Smad4 using EcoRI/BamHI. The resulting fragment was subsequently ligated into pET30ax vector using the same sites.                                                                                                                              |
| GFP-Smad2            | pEGFP-C1 (Clontech)     | BamHI/KpnI    | 5'-AGC TCT GAA TTC TAT GTC GTC CAT CTT GCC ATT-3', 5'-AGC TCT GGT ACC TTA TGA CAT GCT TGA GCA ACG-3'               | The CDS of human Smad2 was PCR-amplified using IMAGE clone 5221801 (GenBank Accession No.: BC025699) as the template. The resulting PCR product was subsequently digested by BamHI/KpnI and ligated into pGEB vector using the same sites.                                                      |
| GFP-Smad2-SA         | pEGFP-C1 (Clontech)     | EcoRI/KpnI    | 5'-AGC TCT GAA TTC TAT GTC GTC CAT CTT GCC ATT-3', 5'-AGC TCT GGT ACC TTA AGC CAT TGC TGA GCA ACG CAC TGA AGG G-3' | The CDS of Smad2 was PCR-amplified using IMAGE clone 5221801 (GenBank Accession No.: BC025699) as the template. The resulting PCR product was subsequently digested by EcoRI/KpnI and ligated into pGEB vector using the same sites. The construct contains S465A and S467A mutations.          |
| GFP-Smad2-SE         | pEGFP-C1 (Clontech)     | EcoRI/KpnI    | 5'-AGC TCT GAA TTC TAT GTC GTC CAT CTT GCC ATT-3', 5'-AGC TCT GGT ACC TTA CTC CAT TTC TGA GCA ACG CAC TGA AGG G-3' | The CDS of Smad2 was PCR-amplified using IMAGE clone 5221801 (GenBank Accession No.: BC025699) as the template. The resulting PCR product was subsequently digested by EcoRI/KpnI and ligated into pGEB vector using the same sites. The construct contains S465E and S467E mutations.          |
| His-Smad2-SE         | pET30a                  | EcoRI/XhoI    | 5'-AGC TCT GAA TTC TAT GTC GTC CAT CTT GCC ATT-3', 5'-AGC TCT CTC GAG TTA CTC CAT TTC TGA GCA ACG CAC TGA AGG G-3' | The CDS of Smad2-SE was PCR-amplified using IMAGE clone 5221801 (GenBank Accession No.: BC025699) as the template. The resulting PCR product was digested by EcoRI/XhoI and ligated into pET30a vector using the same sites.                                                                    |
| GST-Smad2-MH2        | pGEB                    | EcoRI/BamHI   | 5'-AGC TCT GAA TTC GTT ACT TAC TCA GAA CCT GC-3', 5'-AGC TCT GGA TCC TTA CAT CTG AGT TAA TAC TTT GTC-3'            | The CDS of Smad2 MH2 domain (266-456aa) was PCR-amplified using IMAGE clone 5221801 (GenBank Accession No.: BC025699) as the template. The resulting PCR product was digested by EcoRI/BamHI and ligated into pGEB vector using the same sites.                                                 |
| Myc-Smad2-MH2        | pDMyc-neo               | EcoRI/SalI    | 5'-GTC ACT GAA TTC AAT GGA CAC AGG CTC TCC AG-3', 5'-AGC TCT GTC GAC TTA CAT CTG AGT TAA TAC TTT GTC-3'            | The CDS of Smad2 MH2 domain (242-456aa) was PCR-amplified using IMAGE clone 5221801 (GenBank Accession No.: BC025699) as the template. The resulting PCR product was digested by EcoRI/SalI and ligated into pDMyc-neo vector using the same sites.                                             |
| GST-Smad2-MH1        | pGEB                    | EcoRI/BamHI   | 5'-GTC ACT GAA TTC ATG TCG TCC ATC TTG CCA TTC-3', 5'-AGC TCT GGA TCC CTC GGT GTG TCG GGG CAC-3'                   | The CDS of Smad2 MH1 domain (1-185aa) was PCR-amplified using IMAGE clone 5221801 (GenBank Accession No.: BC025699) as the template. The resulting PCR product was digested by EcoRI/BamHI and ligated into pGEB vector using the same sites.                                                   |
| GFP-Smad1            | pEGFP-C1 (Clontech)     | Sall/BamHI    | 5'-AGT CTA GTC GAC AAT GTG ACA AGT TTA TTT TCC-3', 5'-AGA CTA GGA TCC TTA AGA TAC AGA TGA AAT AGG-3'               | The CDS of Smad1 was PCR-amplified using pRK5F-FLAG-Smad1 (Addgene #12622) as the template. The resulting PCR product was digested by Sall/BamHI and ligated into pEGFP-C1 vector using the same sites.                                                                                         |
| GFP-Smad1-SA         | pEGFP-C1 (Clontech)     | Sall/BamHI    | 5'-AGT CTA GTC GAC AAT GTG ACA AGT TTA TTT TCC-3', 5'-AGA CTA GGA TCC TTA TGC TAC TGC TGA AAT AGG-3'               | The CDS of Smad1-SA was PCR-amplified using pRK5F-FLAG-Smad1(Addgene #12622) as the template. The resulting PCR product was digested by Sall/BamHI and ligated into pEGFP-C1 vector using the same sites.                                                                                       |
| GFP-Smad1-SE         | pEGFP-C1 (Clontech)     | Sall/BamHI    | 5'-AGT CTA GTC GAC AAT GTG ACA AGT TTA TTT TCC-3', 5'-AGA CTA GGA TCC TTA CTC TAC CTC TGA AAT AGG-3'               | The CDS of Smad1-SE was PCR-amplified using pRK5F-FLAG-Smad1(Addgene #12622) as the template. The resulting PCR product was digested by Sall/BamHI and ligated into pEGFP-C1 vector using the same sites.                                                                                       |
| GST-Smad1-MH2        | pGEX-KG (GE Healthcare) | BamHI/HindIII | 5'-GTC ACT GGA TCC TAT GAG GAA CCA AAA CAC TG-3', 5'-GTC ACT AAG CTT TTA AGA TAC AGA TGA AAT AGG-3'                | The CDS of Smad1 MH2 domain (265-465aa) was PCR amplified using Flag-Smad1 as the template. The resulting PCR product was digested by BamHI/HindIII and ligated into pGEX-KG vector using the same sites.                                                                                       |
| GST-Smad3            |                         |               |                                                                                                                    | Addgene #12630; a gift from R. Derynck.                                                                                                                                                                                                                                                         |
| GST-Smad3-MH2        |                         |               |                                                                                                                    | Addgene #12634; a gift from R. Derynck.                                                                                                                                                                                                                                                         |
| GST-Smad3-linker-MH2 |                         |               |                                                                                                                    | Addgene #12633; a gift from R. Derynck.                                                                                                                                                                                                                                                         |
| Flag-Smad1           |                         |               |                                                                                                                    | Addgene #12622; a gift from R. Derynck.                                                                                                                                                                                                                                                         |

other constructs

| name         | vector                  | cloning sites | primers                                                                                                                                            | brief method or source reference                                                                 |
|--------------|-------------------------|---------------|----------------------------------------------------------------------------------------------------------------------------------------------------|--------------------------------------------------------------------------------------------------|
| SBEx4-Luc    | pGL3-promoter (Promega) | KpnI/XhoI     | 5'-CGT CTA GAC ATC AGT CTA GAC GTT CGT CTA GAC AAG CGT CTA GAC C-3', 5'-TCG AGG TCT AGA CGC TTG TCT AGA CGA ACG TCT AGA CTG ATG TCT AGA CGG TAC-3' | The two oligonucleotides were annealed and ligated into KpnI/XhoI digested pGL3-promoter vector. |
| BRE-Luc      |                         |               |                                                                                                                                                    | Addgene #45126; a gift from M. Roussel & P. ten Dijke.                                           |
| mCherry-CAAX |                         |               |                                                                                                                                                    | It was described in Lu <i>et al.</i> , 2009.                                                     |

|                                |  |  |  |                                                        |
|--------------------------------|--|--|--|--------------------------------------------------------|
| Lamp1-mCherry                  |  |  |  | It was described in Shi <i>et al.</i> , 2018.          |
| Lamp1-GFP                      |  |  |  | A gift from T. Kirchhausen.                            |
| mCherry-Rab5                   |  |  |  | A gift from T. Kirchhausen.                            |
| mCherry-Rab7                   |  |  |  | It was described in Mahajan <i>et al.</i> , 2019.      |
| GFP-Rab7                       |  |  |  | A gift from T. Kirchhausen.                            |
| TIR-GFP                        |  |  |  | A gift from T. Kirchhausen.                            |
| GFP-3XFYVE                     |  |  |  | A gift from T. Kirchhausen.                            |
| GFP-Golgin84                   |  |  |  | A gift from M. Lowe.                                   |
| Myc-SNX3                       |  |  |  | A gift from W. Hong (Lu and Hong, 2003).               |
| Ii-Strep_ManII-SBP-GFP         |  |  |  | A gift from F.Perez (Boncompain <i>et al.</i> , 2012). |
| Ii-Strep_TNF $\alpha$ -SBP-GFP |  |  |  | A gift from F.Perez (Boncompain <i>et al.</i> , 2012). |
| GFP-DEN(W34A)                  |  |  |  | It was described in Mahajan <i>et al.</i> , 2019.      |
| pMD2.G                         |  |  |  | Addgene #12259; a gift from D. Trono.                  |
| psPAX2                         |  |  |  | Addgene #12260; a gift from D. Trono.                  |
| Arl5b-WT-GFP                   |  |  |  | It was described in Shi <i>et al.</i> , 2018.          |
| Arl5b-Q70L-GFP                 |  |  |  | It was described in Shi <i>et al.</i> , 2018.          |
| Arl5b-T30N-GFP                 |  |  |  | It was described in Shi <i>et al.</i> , 2018.          |
| GL2-shRNA                      |  |  |  | It was described in Shi <i>et al.</i> , 2018.          |

#### Supplementary References

- Boncompain, G., Divoux, S., Gareil, N., de Forges, H., Lescure, A., Latreche, L., Mercanti, V., Jollivet, F., Raposo, G. and Perez, F. 2012. Synchronization of secretory protein traffic in populations of cells. *Nat Methods*. 9:493–498.
- Lu, L., Ladinsky, M.S. and Kirchhausen, T. 2009. Cisternal organization of the endoplasmic reticulum during mitosis. *Mol. Biol. Cell* 20:3471-3480.
- Lu, L., and Hong, W. 2003. Interaction of Arl1-GTP with GRIP domains recruits autoantigens Golgin-97 and Golgin-245/p230 onto the Golgi. *Mol. Biol. Cell* 14:3767-3781.
- Mahajan, D., B.K. Boh, Y. Zhou, L. Chen, T.C. Cornvik, W. Hong, and L. Lu. 2013. Mammalian Mon2/Ysl2 regulates endosome-to-Golgi trafficking but possesses no guanine nucleotide exchange activity toward Arl1 GTPase. *Sci Rep*. 3:3362.
- Mahajan, D., Tie, H.C., Chen, B. and Lu, L. 2019. Dopey1-Mon2 complex binds to dual-lipids and recruits kinesin-1 for membrane trafficking. *Nat. Commun.* 10:3218.
- Madugula, V. and Lu, L. 2016. A ternary complex comprising transportin1, Rab8 and the ciliary targeting signal directs proteins to ciliary membranes. *J. Cell Sci.* 129:3922-3934.
- Shi, M., Chen, B., Mahajan, D., Boh, B.K., Zhou, Y., Dutta, B., Tie, H.C., Sze, S.K., Wu, G. and Lu, L. 2018. Amino acids stimulate the endosome-to-Golgi trafficking through Ragulator and small GTPase Arl5. *Nat. Commun.* 9:4987.
